# Supplementary material for: Lingual Gyrus Surface Area Is Associated with Anxiety-Depression Severity in Young Adults: A Genetic Clustering Approach
Source: eNeuro. 2018 Jan 19;5(1):ENEURO.0153-17.2017. doi: 10.1523/ENEURO.0153-17.2017 (PMC5773884; doi:10.1523/ENEURO.0153-17.2017)
Supplement: Extended Data Figure 2-4 — Description of vertices in each of right SA clusters. Download Figure 2-4, XLS file. [file sup_enu-eN-NWR-0153-17-s02.xls]

0 27.2127 -13.89231 60.79919 1
1 62.58517 -9.39504 27.9486 2
2 38.78837 40.69585 23.65587 1
3 13.78316 23.40647 30.00751 7
4 9.2684 -51.31675 48.19218 4
5 31.04326 -47.56586 44.64975 5
6 46.02609 -43.96819 7.22713 8
7 36.81967 -12.74256 1.54868 11
8 14.20321 25.43947 -15.95939 7
9 12.571 -42.71379 1.92936 3
10 20.77026 -99.74168 3.94422 3
11 47.73708 -20.29135 -27.42843 9
12 2.96985 -33.47071 65.21861 6
13 13.64342 -18.51969 38.486 4
14 11.06529 14.58126 62.39275 6
15 29.68662 -31.19986 69.52496 5
16 16.09924 -60.39371 63.27837 5
17 40.74986 -11.87986 43.02555 1
18 43.809 -27.52665 37.96626 5
19 32.20168 19.34855 47.5715 1
20 37.61356 6.32421 23.78224 1
21 12.44606 54.98142 26.49584 6
22 8.03285 36.29976 -5.59135 7
23 27.47126 57.65965 -9.71103 7
24 1.05462 -6.72912 20.99777 -1
25 10.45302 -22.9346 -16.85337 -1
26 8.24293 -53.10601 19.8087 4
27 19.47608 -81.24038 37.02857 3
28 13.12565 -77.73697 4.24411 3
29 34.53712 -72.56919 28.73663 8
30 49.75663 -53.80503 35.15887 8
31 43.9306 -68.90746 6.35977 8
32 56.68245 -38.57763 27.9234 10
33 44.36628 -12.5902 20.31294 2
34 64.99541 -16.24398 2.33402 10
35 48.84762 26.24647 4.80638 11
36 27.67594 20.66578 -8.93843 11
37 30.80131 -41.83485 -9.44462 12
38 29.54714 -8.46858 -29.61117 9
39 34.39135 -74.07191 -12.33095 12
40 62.17071 -33.39402 -15.36139 8
41 46.34203 7.21909 -27.419 9
42 13.32246 -19.96547 73.39974 6
43 8.11133 -9.11939 65.69213 6
44 21.77173 0.75988 64.48917 6
45 15.27445 -42.47833 58.2431 4
46 14.79197 -39.98827 40.69359 4
47 8.10236 -26.87227 49.68447 6
48 10.28687 -1.54605 53.94707 6
49 11.48679 2.2318 39.84605 7
50 7.4299 19.82837 47.35871 6
51 22.12562 -24.31694 56.999 1
52 12.56324 -34.2571 67.93523 5
53 27.58387 -41.27049 52.65391 5
54 30.74509 -54.34315 58.57922 5
55 21.309 -44.90638 60.06924 5
56 11.3428 -46.91835 71.47465 5
57 7.56686 -58.88153 56.46957 4
58 38.96616 -9.44246 61.14998 1
59 33.90282 -26.12385 46.41195 1
60 45.62104 -10.41111 27.70241 2
61 52.2814 -18.98279 36.39307 2
62 49.21309 -15.9732 49.42159 2
63 42.00821 -31.88438 55.72289 5
64 33.92196 -37.5556 38.40327 5
65 25.05799 0.22291 46.61534 1
66 38.09872 1.11545 47.97289 1
67 33.03659 29.31934 35.49201 1
68 44.49379 24.11489 28.69126 1
69 38.57312 16.06551 38.82947 1
70 51.07164 -0.48679 37.20078 1
71 59.49252 4.47326 23.20798 2
72 22.06682 17.14724 51.08001 6
73 8.91081 42.54335 29.76327 7
74 9.9222 38.01019 49.49334 6
75 21.10673 32.83154 35.09156 1
76 22.98177 44.0347 22.12055 1
77 7.04176 36.8182 14.39927 7
78 10.89976 52.1397 9.25611 7
79 5.68273 34.04838 -21.55536 7
80 15.14025 43.35648 -21.70653 7
81 7.5428 56.27737 -10.94647 7
82 20.77745 61.05507 4.716 1
83 35.28803 50.51385 7.27147 1
84 7.54354 13.59483 26.23512 7
85 1.44876 18.03544 10.58609 -1
86 5.98632 -27.92994 12.90341 -1
87 19.84209 -34.87165 -0.98803 -1
88 1.9564 -12.11867 2.97262 -1
89 5.28002 8.16033 -5.46262 -1
90 11.17647 -1.5488 -13.88248 -1
91 5.49501 -9.5861 33.1023 7
92 13.98153 -52.34563 34.40042 4
93 6.30165 -34.62108 34.74945 4
94 2.27311 -33.76815 25.30121 4
95 7.92877 -50.07379 8.66751 3
96 6.1845 -68.99689 40.1523 4
97 12.64725 -63.44863 30.10948 4
98 10.74613 -89.69471 20.33858 3
99 14.8839 -93.33134 5.2217 3
100 4.32878 -73.54463 20.07056 3
101 23.1332 -62.39131 13.29763 3
102 23.81027 -62.32277 0.92335 3
103 13.20264 -72.94936 50.07342 4
104 33.58326 -62.30498 45.96394 5
105 25.31717 -61.5751 47.50735 5
106 23.95016 -79.28731 28.86379 3
107 27.40111 -85.55338 12.98605 3
108 43.61461 -53.38895 43.06099 8
109 40.82316 -67.01753 37.81963 8
110 44.24119 -49.43855 20.72143 8
111 53.54548 -57.40704 5.94752 8
112 46.27001 -60.90339 20.52781 8
113 43.53701 -77.35713 18.76288 8
114 35.61761 -82.50798 -0.16877 3
115 47.90632 -42.79616 37.4738 8
116 57.87584 -26.3984 28.17344 2
117 57.45217 -31.64892 44.61262 2
118 53.75185 -44.36494 29.18341 8
119 59.2593 -39.93084 14.11758 8
120 59.35355 -12.07837 17.71928 2
121 43.07129 -29.64489 21.88072 10
122 34.41056 -13.71729 15.32748 11
123 47.17619 -18.54427 1.56937 10
124 37.95648 -29.18126 12.72167 10
125 59.94336 -31.26663 10.00491 10
126 53.17701 -30.98905 1.51271 10
127 57.17757 4.1992 8.25718 2
128 39.8371 33.69585 9.23089 1
129 50.38067 20.4003 18.7272 1
130 45.32925 7.94527 6.06724 11
131 32.94989 14.17923 12.45609 11
132 41.4244 40.12701 -5.57822 11
133 23.39605 20.27916 -19.33317 7
134 32.51958 34.96385 -7.11278 11
135 35.84761 30.5853 -2.10486 11
136 36.78445 6.07483 -2.30974 11
137 34.74725 -19.13208 -12.84505 -1
138 23.8682 -1.7839 -13.18465 -1
139 17.54667 -38.34393 -7.67192 3
140 37.14011 -37.36894 -7.65526 -1
141 22.53717 -21.19078 -23.51705 9
142 35.45853 -31.37905 -23.23782 9
143 34.48617 -9.4508 -36.12533 9
144 13.058 -66.80818 -1.87745 12
145 25.47714 -94.92421 -13.86178 3
146 11.71749 -87.14152 -14.29797 3
147 30.06209 -64.22418 -8.94131 12
148 41.21194 -47.26074 -19.82371 12
149 43.69736 -76.66256 -9.24369 8
150 58.91089 -40.90171 -4.87425 8
151 53.80973 -54.03743 -5.42059 8
152 48.76333 -55.29934 -14.56196 8
153 55.95805 -29.61592 -25.31829 9
154 46.741 -24.70744 -11.22059 10
155 49.78782 -4.28556 -12.52432 10
156 56.30037 -3.45595 -9.15709 10
157 61.83736 -8.36899 -22.54368 9
158 46.76626 -5.13118 -38.0452 9
159 43.46304 1.66916 -23.53112 11
160 33.68242 1.27877 -17.34105 -1
161 31.35438 10.96296 -36.7752 9
162 20.4806 -16.36092 68.86601 6
163 14.56311 -11.20795 62.40301 6
164 19.79007 -7.84342 59.15325 6
165 4.87592 -25.96674 73.80779 6
166 5.21774 -21.24378 66.82824 6
167 8.88755 -14.05985 68.88538 6
168 14.41757 -2.55032 67.81873 6
169 9.52143 2.62009 66.84145 6
170 17.01532 7.88259 61.41534 6
171 7.59716 -39.24027 60.41923 6
172 11.12212 -35.27581 52.61727 6
173 6.7352 -30.21632 57.0254 6
174 10.47643 -48.125 52.4543 4
175 7.45706 -45.04038 46.15897 4
176 17.11239 -42.98843 48.85417 4
177 16.7637 -33.11015 44.40741 4
178 14.87499 -30.1519 36.81269 4
179 15.05371 -23.20334 44.5065 6
180 8.35833 -5.02652 59.8264 6
181 7.55946 6.89359 60.66213 6
182 5.90456 -18.89352 58.77755 6
183 6.74261 -15.22736 50.64745 6
184 12.5645 -10.87271 47.14507 6
185 9.49648 9.04379 51.30261 6
186 7.43341 18.82874 57.45702 6
187 10.82526 -7.89063 41.80764 7
188 11.8199 -0.0158 46.83499 6
189 11.40786 11.98157 43.29852 7
190 12.49592 13.37313 35.56478 7
191 9.77426 22.60338 38.81052 7
192 28.53818 -20.38209 69.27624 1
193 18.3471 -24.06223 66.5107 1
194 23.17481 -30.7111 55.68475 1
195 21.08738 -30.68905 68.57387 5
196 14.75492 -30.71274 58.06273 1
197 10.0664 -29.16602 67.01261 6
198 5.31084 -36.6318 70.05165 6
199 27.74903 -35.515 58.65735 5
200 24.85727 -42.83411 57.20638 5
201 21.44605 -35.90308 62.0012 5
202 33.78722 -44.92763 51.57569 5
203 32.25394 -50.29578 52.42523 5
204 35.45667 -46.22197 59.17678 5
205 29.88471 -48.22118 64.09636 5
206 24.26492 -57.84349 63.64568 5
207 21.09048 -51.36494 58.9539 5
208 11.54444 -37.55217 76.58153 5
209 7.81777 -40.29653 70.18819 6
210 16.66769 -35.8932 69.41801 5
211 16.33249 -46.41125 66.74377 5
212 13.24951 -51.89909 62.02695 5
213 13.01598 -45.22649 65.62208 4
214 10.37116 -61.0754 61.36691 5
215 8.3996 -52.96946 63.37136 5
216 7.44588 -49.68945 59.10199 4
217 8.38929 -55.04304 52.19489 4
218 32.61915 -13.31006 60.55077 1
219 35.75085 -21.08613 64.06797 1
220 40.68736 -10.10651 53.19875 1
221 32.88089 -17.18872 45.48032 1
222 37.60808 -18.69151 54.44933 1
223 27.72441 -23.95399 50.61399 1
224 31.46353 -29.69496 56.02396 1
225 41.56835 -10.88303 34.55502 1
226 46.15874 -17.0631 35.83651 2
227 37.15827 -18.9665 36.27901 1
228 54.70967 -10.41595 28.2062 2
229 57.53797 -14.45563 34.49613 2
230 55.5486 -11.86925 38.82843 2
231 55.20076 -16.03593 46.00336 2
232 47.68733 -23.09098 38.26967 2
233 50.03996 -21.91554 48.26723 2
234 41.51003 -26.14672 59.85027 5
235 37.42229 -34.02266 64.23891 5
236 40.76073 -20.93024 47.50217 1
237 48.59095 -21.57293 57.59031 5
238 42.08979 -28.49723 46.83525 5
239 32.72922 -35.7107 53.25798 5
240 38.35624 -31.71884 38.19855 5
241 34.24819 -32.79375 44.78249 5
242 29.98524 -39.7508 45.58673 5
243 32.00552 -43.71529 40.98161 5
244 23.42185 -10.28288 50.57657 1
245 30.0292 -10.28459 48.28653 1
246 30.81439 9.0102 50.75968 1
247 37.07199 9.86662 55.38021 1
248 30.91616 0.28682 48.27469 1
249 37.70933 -6.86817 48.97154 1
250 45.94166 -4.66423 50.1371 1
251 32.79685 27.70324 44.01543 1
252 37.53902 24.23356 38.05 1
253 39.29505 20.91277 46.24595 1
254 36.85787 33.82194 29.68946 1
255 46.1884 33.34472 26.64304 1
256 42.4846 27.41965 31.53715 1
257 39.83696 19.33295 32.07394 1
258 35.55582 17.51987 24.64342 1
259 32.85127 10.80688 31.18505 1
260 44.59038 2.62222 43.68633 1
261 51.69363 -5.08671 43.42905 1
262 38.85107 9.57897 46.56921 1
263 37.58198 3.91499 37.56334 1
264 42.32064 2.01661 30.50854 1
265 53.09715 -4.52279 34.62797 1
266 49.63359 4.64338 25.36716 2
267 55.78146 4.21037 31.50212 1
268 52.66741 -3.84031 24.42237 2
269 57.73613 -8.13598 18.05237 2
270 21.78852 0.14066 54.53826 6
271 18.08772 18.19164 57.82177 6
272 20.91696 9.52945 57.33912 6
273 22.7468 8.69145 46.96563 1
274 25.90055 15.57429 42.88075 1
275 7.16818 30.71157 50.68705 6
276 10.05947 26.18497 56.08852 6
277 11.42435 33.26243 29.78281 7
278 8.21289 32.49638 38.82862 6
279 7.10261 43.30776 41.48952 6
280 7.24639 53.49849 30.66684 6
281 10.97783 48.38697 39.425 6
282 21.0073 26.29694 43.67626 1
283 27.07926 24.79309 39.40173 1
284 18.10135 29.44556 53.07433 6
285 17.39024 38.16627 43.04888 6
286 18.00746 45.84107 32.84034 1
287 27.92509 32.02322 35.95993 1
288 22.00645 53.62121 25.80263 1
289 24.1867 40.71603 31.6166 1
290 28.79653 33.80289 28.44712 1
291 30.73191 40.90317 20.58417 1
292 10.06586 30.49557 22.1505 7
293 14.50369 38.72416 20.1822 7
294 7.26567 38.92136 4.07403 7
295 14.77739 44.16869 0.01575 7
296 15.10364 42.98004 9.94062 7
297 9.53556 47.854 19.54025 7
298 9.0392 58.20378 18.86112 7
299 8.83722 33.59521 -13.38692 7
300 7.26326 45.92597 -16.77712 7
301 7.53354 44.80211 -8.07742 7
302 7.23124 30.07424 -23.90357 7
303 13.33758 34.35307 -23.99815 7
304 8.80346 42.81509 -20.68341 7
305 9.09468 54.16273 -20.6891 7
306 19.51587 52.17138 -13.89373 7
307 12.28829 58.10228 -13.50528 7
308 9.79763 63.5673 7.82722 7
309 15.27247 59.43346 14.51493 1
310 11.04222 54.69659 -0.33012 7
311 10.41002 65.15654 -3.76573 7
312 20.52741 56.57502 -2.74772 7
313 22.375 55.87264 15.44848 1
314 31.18749 49.52819 -2.18178 1
315 24.27577 51.01516 5.38231 1
316 27.99893 47.74517 13.42866 1
317 37.1068 49.38991 16.65807 1
318 6.20219 20.52511 29.31112 7
319 7.88101 25.08282 19.90744 7
320 -0.00944 4.33083 24.83488 -1
321 1.28551 5.25016 15.83717 -1
322 -0.00923 17.02312 20.00413 -1
323 2.85737 28.47271 12.20699 7
324 -0.16143 29.36975 2.57381 -1
325 2.06572 -18.00379 16.1888 -1
326 3.88497 -19.62619 9.16202 -1
327 2.43308 -7.78113 12.04014 -1
328 7.8855 -35.58802 6.11363 -1
329 19.37732 -36.54149 5.54336 -1
330 8.74122 -31.32896 4.42624 -1
331 6.8232 -25.87765 -1.01725 -1
332 15.9172 -27.49075 -6.83499 -1
333 1.87098 -23.81438 -7.27856 -1
334 1.78312 14.04979 0.83753 -1
335 5.22492 23.77327 -6.10502 7
336 2.32304 2.19468 6.22675 -1
337 4.07215 -4.35526 -2.71424 -1
338 2.0864 -11.49616 -11.18087 -1
339 7.0944 20.97083 -13.34943 7
340 9.20083 -12.76914 -17.53398 -1
341 6.76701 1.2165 -10.60328 7
342 5.73386 17.40988 -20.5867 7
343 10.41148 14.57894 -16.28738 7
344 5.42604 10.1479 35.32354 7
345 5.85586 -14.2065 39.60638 4
346 5.14766 -2.36837 39.54131 7
347 7.28589 2.57459 31.24379 7
348 2.09454 -6.90352 29.59095 7
349 6.42455 -37.63309 41.79969 4
350 7.10549 -28.36574 40.27692 4
351 12.07998 -52.80831 41.66306 4
352 8.74781 -45.33363 40.01916 4
353 12.64786 -42.64134 33.32362 4
354 10.7238 -52.59208 27.38318 4
355 5.02486 -45.15767 30.29787 4
356 6.64828 -21.08707 29.02259 4
357 -0.06828 -19.99191 24.09342 -1
358 4.21414 -23.46013 33.81927 4
359 7.72153 -34.15034 29.45318 4
360 8.43984 -44.45204 23.41738 4
361 0.64136 -31.16456 17.73328 -1
362 5.7999 -53.81663 13.07797 3
363 3.80474 -43.50418 17.52366 3
364 1.58243 -40.9357 8.4301 -1
365 10.5258 -47.43675 4.53152 3
366 9.10274 -59.02262 44.46925 4
367 7.62924 -59.71601 37.47789 4
368 16.60725 -71.132 39.83321 4
369 19.38461 -69.91457 32.87223 3
370 8.19229 -68.24774 34.66175 4
371 5.74794 -60.17556 30.73947 4
372 5.29248 -62.4629 23.78664 4
373 8.52158 -85.07542 34.9705 3
374 6.36253 -82.7636 22.05295 3
375 9.62873 -79.3586 28.52495 3
376 14.7314 -96.36429 10.81031 3
377 12.59872 -101.82841 3.71082 3
378 6.23457 -94.20366 12.44107 3
379 4.24515 -85.02428 9.38327 3
380 13.92775 -86.64537 5.34614 3
381 7.61905 -76.78226 13.28526 3
382 21.64629 -60.45497 23.87865 3
383 13.10361 -56.62616 20.44583 3
384 18.88942 -74.20401 20.72194 3
385 13.31877 -65.20857 14.87656 3
386 16.95176 -69.55894 10.55932 3
387 16.43802 -55.16443 13.41167 3
388 13.7123 -69.76041 5.05524 3
389 25.07835 -65.73789 6.66285 3
390 21.9669 -54.81008 6.87109 3
391 23.07034 -50.78914 1.50376 3
392 8.16488 -63.3949 49.10039 4
393 12.45226 -67.30358 55.95173 5
394 8.29147 -67.04887 53.42655 4
395 7.70242 -73.47416 45.35398 4
396 17.28753 -75.32022 43.95287 3
397 23.58648 -56.67957 50.7285 5
398 18.73533 -60.70378 54.59376 5
399 30.55719 -54.5417 40.30675 5
400 27.25839 -55.86554 46.55456 5
401 29.60693 -61.75455 45.16203 5
402 34.76931 -67.90202 39.16573 8
403 29.81235 -62.09549 34.57042 5
404 21.54992 -71.7929 41.05824 3
405 21.52554 -84.53757 38.36969 3
406 19.87155 -66.68447 50.08643 5
407 22.53372 -63.09991 34.98288 5
408 29.04325 -68.31822 22.31195 3
409 17.28187 -87.2533 25.69178 3
410 33.73246 -76.49432 17.77368 3
411 23.639 -81.20793 18.24977 3
412 20.42594 -91.61395 18.11169 3
413 24.86493 -94.27007 11.68604 3
414 35.37789 -50.99352 37.91824 5
415 39.70681 -57.7365 40.92894 8
416 50.01542 -55.1052 43.29034 8
417 47.60969 -60.31669 35.90351 8
418 45.68575 -60.61607 44.11788 8
419 38.62359 -65.89188 47.34806 8
420 36.0745 -75.72716 38.72318 8
421 47.86887 -52.43114 27.21536 8
422 46.07564 -56.39431 20.80381 8
423 47.19697 -59.31894 27.05836 8
424 44.82268 -48.12691 13.1269 8
425 54.48011 -51.01729 7.0575 8
426 49.81263 -54.6115 13.30933 8
427 45.50052 -57.08296 12.08976 8
428 45.81186 -60.89547 6.28738 8
429 38.41637 -62.05375 12.94108 8
430 39.17379 -72.36966 29.72513 8
431 38.17968 -81.78109 25.9222 8
432 46.46316 -65.52588 28.24837 8
433 38.64008 -67.37463 22.42403 8
434 45.10256 -72.46619 13.05597 8
435 36.76718 -84.25698 15.06905 8
436 47.5915 -78.22061 5.4108 8
437 37.43166 -76.34437 9.10649 8
438 29.14514 -86.82152 8.74687 3
439 26.39898 -92.18404 1.02685 3
440 37.49065 -45.69139 35.4373 5
441 45.2371 -36.29177 42.00051 5
442 40.87088 -39.99348 36.02865 5
443 45.34927 -48.46189 38.65221 8
444 51.68789 -49.6358 39.86951 8
445 54.16933 -26.6639 38.73201 2
446 50.64151 -32.04668 42.42213 2
447 57.71528 -18.60074 26.9127 2
448 56.27737 -23.54597 31.6795 2
449 60.29012 -27.21442 36.59118 2
450 52.673 -31.7539 32.54413 2
451 58.96568 -35.2309 36.59917 2
452 53.12842 -44.59927 38.36899 8
453 55.74672 -51.07797 31.29694 8
454 52.28691 -38.77018 45.30756 8
455 56.33374 -39.41359 37.48098 8
456 60.76349 -39.76598 26.94147 10
457 52.38826 -48.00985 24.86847 8
458 63.18374 -38.00067 19.29099 10
459 57.56083 -43.89991 20.63362 8
460 51.35118 -44.63266 17.58827 8
461 49.83878 -39.66138 11.90447 8
462 63.74762 -12.74471 20.6634 2
463 58.05176 -20.27411 20.47674 2
464 51.16769 -13.39981 17.61515 2
465 42.94799 -22.00979 19.29414 2
466 50.81333 -21.66501 17.58202 2
467 50.32021 -25.80438 25.15486 2
468 46.63206 -34.64935 27.63984 10
469 37.30939 -12.18273 20.33944 10
470 32.09582 -24.2895 14.02449 10
471 34.76982 -23.75109 20.60537 10
472 37.59887 -13.70547 8.72658 11
473 38.54033 -22.82592 -2.77639 10
474 34.25444 -24.26518 5.08357 10
475 42.3238 -23.05066 7.6975 10
476 56.31885 -13.89036 1.64227 10
477 51.35344 -23.05281 4.17434 10
478 45.63834 -37.02158 17.96216 10
479 56.89509 -36.00161 18.35186 10
480 36.7289 -33.74799 19.53769 10
481 47.50971 -31.08709 9.02966 10
482 63.11221 -23.48807 5.68673 10
483 64.86717 -34.77633 11.91666 10
484 61.18638 -23.24133 -0.32466 10
485 65.79237 -29.99799 3.27458 10
486 57.84568 -35.37734 6.3804 10
487 46.17304 -36.74771 5.06192 8
488 61.72708 -5.70054 11.87515 2
489 48.29527 4.15577 17.52101 2
490 58.35227 5.09838 15.5832 2
491 56.88284 -6.20914 11.18779 2
492 51.20848 -5.72257 9.2108 2
493 42.04766 23.67733 20.3553 1
494 41.61564 14.1467 20.77169 1
495 37.28555 37.92157 17.7027 1
496 41.75977 30.35716 19.72552 1
497 46.7415 27.2746 13.66533 1
498 51.39017 30.38416 5.17988 11
499 54.42793 23.68953 12.0098 11
500 52.71083 5.9523 1.76379 2
501 46.66628 -3.11429 13.6259 2
502 48.78093 9.70072 12.32243 2
503 54.14711 13.97674 9.28466 11
504 45.52831 16.8498 8.61159 11
505 40.43467 -0.98097 17.00061 11
506 39.43998 22.751 9.92751 11
507 39.16814 11.07954 11.11247 11
508 34.94487 -0.20291 14.74587 11
509 34.75637 0.1176 8.35126 11
510 37.90964 44.40225 8.77645 1
511 39.12215 52.80817 -6.25205 11
512 39.46951 49.5089 1.81067 1
513 42.3042 37.91916 1.98915 11
514 51.48721 32.91024 -1.57071 11
515 23.47908 38.54859 -12.851 7
516 30.73801 46.52973 -11.42306 11
517 14.49129 20.73282 -24.42033 7
518 19.73032 29.65383 -19.81972 7
519 27.30031 28.4228 -13.22521 11
520 29.34851 21.18457 -18.11601 11
521 37.62 25.78054 -17.04046 11
522 48.89443 33.20356 -9.35293 11
523 40.95555 30.3721 1.90245 11
524 41.61455 42.54385 -12.87936 11
525 44.81516 28.63891 -13.42107 11
526 30.8686 27.24398 -6.12055 11
527 31.2715 25.42578 8.27139 11
528 34.79565 15.77891 -4.98555 11
529 31.04457 21.4755 1.26935 11
530 32.17377 11.04508 5.11018 11
531 37.4669 -4.18224 -0.21538 11
532 17.41413 -1.29874 -11.99443 -1
533 16.98269 12.00318 -14.90709 7
534 21.90247 -21.45342 -12.89401 -1
535 18.65611 -12.5262 -12.40622 -1
536 29.15902 -11.3965 -13.04015 -1
537 38.92089 -14.61511 -21.87369 -1
538 35.56547 -8.10087 -22.69076 -1
539 31.14539 -34.79145 0.6685 -1
540 28.13638 -29.90046 -7.99821 -1
541 14.99223 -39.91355 -2.68645 3
542 26.21074 -40.50953 2.07203 -1
543 27.12796 -38.94572 -7.29553 -1
544 21.59178 -41.63944 -10.01899 12
545 21.668 -30.82771 -12.43777 12
546 36.79373 -22.99108 -19.21146 -1
547 23.95886 -13.58672 -27.30136 9
548 38.66094 -28.17484 -10.20326 -1
549 30.76905 -29.13827 -16.02778 -1
550 26.38622 -30.4267 -19.57583 12
551 26.84973 -15.87091 -31.11884 9
552 25.39132 -6.35205 -34.12328 9
553 37.67662 -37.83077 -14.66959 12
554 32.7478 -24.62551 -22.73327 9
555 37.615 -18.93894 -27.95442 9
556 40.2509 -27.28065 -22.42625 9
557 40.11616 -10.11937 -28.4319 9
558 20.09049 -52.03025 -3.47539 3
559 3.68959 -71.20469 5.63501 3
560 8.57749 -60.67844 3.9005 3
561 13.41361 -51.03341 -4.95936 3
562 23.1389 -54.69241 -7.13252 12
563 8.26945 -94.2056 -6.27411 3
564 3.93161 -84.36698 -4.46038 3
565 23.17208 -99.30397 -7.8428 3
566 16.9182 -98.28313 -9.03518 3
567 16.27328 -92.14577 -7.44062 3
568 28.18056 -85.7935 -12.06225 12
569 23.47709 -83.0706 -9.22777 12
570 22.192 -65.61108 -5.82811 12
571 33.39202 -52.87091 -7.78923 12
572 12.19739 -77.62653 -5.02248 3
573 21.51589 -75.72002 -8.62521 12
574 29.06146 -71.00279 -11.92084 12
575 29.94882 -45.84687 -15.02405 12
576 38.48719 -62.14056 -17.66113 12
577 32.10214 -54.81795 -15.69374 12
578 34.96915 -40.28243 -21.81238 9
579 44.01059 -35.08613 -20.60672 9
580 30.89248 -91.16033 -6.40235 3
581 43.16694 -74.03227 0.22181 8
582 41.89503 -83.50441 -3.8087 8
583 38.89436 -87.35715 -13.4662 12
584 40.53891 -76.60242 -15.15907 12
585 56.11098 -57.97347 0.95021 8
586 47.14085 -60.18409 1.71428 8
587 51.419 -43.65544 0.45127 8
588 61.50608 -49.66163 3.24697 8
589 62.73098 -45.62305 -4.93788 8
590 64.39198 -34.93876 -8.11973 8
591 57.10522 -41.94371 -11.02351 8
592 44.81058 -63.31704 -10.14352 8
593 40.77419 -63.85947 -12.62698 12
594 44.89159 -62.3633 -4.40222 8
595 56.20634 -57.29223 -11.76524 8
596 58.03922 -46.68897 -19.74475 8
597 42.32156 -50.31347 -12.53919 12
598 54.79831 -33.21355 -17.39761 9
599 53.23524 -43.81773 -20.97257 9
600 48.75682 -37.80874 -19.87421 9
601 53.06008 -26.47277 -29.01969 9
602 45.05217 -36.98602 -2.70851 8
603 53.44527 -19.46357 -3.38033 10
604 45.9412 -27.35701 -2.5305 10
605 52.33472 -32.87305 -9.126 8
606 62.4444 -26.21452 -12.17852 8
607 58.30025 -4.3681 -1.96673 10
608 61.91052 -9.32258 -3.46186 10
609 39.36768 -16.695 -8.98703 11
610 49.80499 -12.85671 -5.79544 10
611 56.67742 5.35364 -8.09033 10
612 52.3332 11.57139 -16.64372 10
613 51.57655 1.73264 -19.40181 10
614 56.38856 -17.40335 -16.76467 10
615 63.53321 -19.78393 -17.04495 9
616 48.68259 -14.38971 -11.89889 10
617 49.77483 -8.48553 -21.93443 10
618 56.27232 1.60902 -27.94908 9
619 56.37809 -18.8778 -22.79457 9
620 48.50535 4.87658 -34.25185 9
621 51.94473 -7.72136 -27.92084 9
622 55.43077 -16.4305 -32.66027 9
623 48.0409 -13.45332 -37.66865 9
624 37.55721 -9.81918 -10.74597 11
625 36.38879 6.41064 -11.43474 11
626 37.81862 -2.42017 -11.48532 11
627 47.17135 -0.90554 -18.76093 11
628 45.65657 16.1376 -23.83071 9
629 25.23157 12.13658 -17.30256 7
630 30.38534 12.27537 -14.35749 11
631 20.41947 11.85508 -18.54923 7
632 29.4528 -0.28648 -13.46095 -1
633 32.23767 -2.91262 -25.6468 9
634 38.42756 14.80589 -32.35076 9
635 41.43509 13.16804 -36.49941 9
636 37.3647 3.44884 -24.06893 9
637 31.37547 6.73395 -32.54188 9
638 26.69526 2.63647 -36.2216 9
639 38.72003 1.10923 -37.16351 9
640 32.21257 0.08169 -41.25421 9
641 40.41644 -5.51483 -41.27688 9
642 23.7385 -14.43299 65.89925 6
643 20.28662 -14.12985 62.34177 6
644 21.28996 -11.76927 59.12101 6
645 16.92197 -17.98563 70.76805 6
646 13.93283 -16.77788 67.11265 6
647 17.10846 -15.39968 64.54964 6
648 17.3996 -9.78556 61.12903 6
649 17.97862 -5.02191 63.81373 6
650 20.4245 -3.42121 61.88934 6
651 8.92389 -22.61317 75.16704 6
652 7.12874 -19.46691 72.3619 6
653 10.86777 -17.66541 70.17012 6
654 2.9972 -29.24429 69.58195 6
655 3.95864 -27.05768 66.14835 6
656 4.54965 -23.2183 70.5247 6
657 5.54536 -16.72197 69.57072 6
658 4.72838 -14.60438 66.40389 6
659 7.50151 -11.14229 68.44109 6
660 14.82525 -6.26176 65.5675 6
661 18.28625 -0.38838 66.09506 6
662 11.65854 -12.50964 65.43504 6
663 11.29554 -8.85028 67.76656 6
664 10.55199 -5.68852 68.35873 6
665 16.15697 2.41956 63.96618 6
666 19.72861 5.03844 64.17644 6
667 9.08452 -2.66793 67.09215 6
668 12.03843 0.15755 66.77711 6
669 13.0042 5.19216 63.23231 6
670 10.3519 8.53507 64.4088 6
671 13.55411 11.07744 60.77081 6
672 4.15618 -38.04961 62.55089 6
673 4.5302 -35.79259 57.9063 6
674 4.95804 -31.90069 61.29581 6
675 12.50686 -38.98209 59.78302 4
676 13.9721 -38.18 55.61119 4
677 8.50803 -37.0849 56.35958 6
678 5.44875 -33.7178 53.49248 6
679 9.07001 -31.50185 50.76231 6
680 5.43281 -28.54921 53.06528 6
681 14.33221 -46.56933 55.39119 4
682 14.66094 -46.53057 50.56499 4
683 16.33548 -42.81759 53.58057 4
684 6.05144 -48.37053 50.26368 4
685 7.0869 -48.1894 46.85775 4
686 9.27722 -46.24433 48.9558 4
687 13.91162 -45.15683 46.50788 4
688 11.68335 -43.16691 43.74224 4
689 17.06283 -42.05613 44.00266 4
690 14.13111 -33.96844 48.73267 4
691 13.08166 -29.69675 47.75999 6
692 16.04512 -38.01967 51.42186 4
693 17.70745 -37.97401 46.7817 4
694 18.06775 -37.21611 41.59175 4
695 16.03756 -28.23887 43.83968 6
696 12.31786 -25.07746 47.64645 6
697 15.40789 -35.57925 38.56232 4
698 17.65881 -31.86525 39.68172 4
699 16.9219 -26.39097 39.53931 4
700 14.46598 -24.41253 37.13466 4
701 15.79682 -20.8987 40.78345 6
702 7.0264 5.01277 65.55917 6
703 7.99801 11.41142 63.24231 6
704 9.02939 -6.74729 62.33604 6
705 6.81744 -0.89476 65.09199 6
706 7.12862 0.78403 61.45314 6
707 8.58871 -2.99522 57.23486 6
708 7.89575 2.77866 56.68392 6
709 5.8409 -19.87122 62.89783 6
710 5.81817 -13.55773 62.43435 6
711 5.51815 -25.78915 62.10542 6
712 6.91132 -24.52642 57.99573 6
713 6.45552 -23.1348 54.28962 6
714 5.78699 -10.17558 55.1862 6
715 7.30986 -7.94874 52.84641 6
716 7.3367 -12.38713 58.14574 6
717 4.71773 -17.54738 54.40605 6
718 7.89372 -21.21355 50.43257 6
719 10.18185 -13.12028 49.52007 6
720 9.80026 -6.49962 50.44765 6
721 11.14317 -19.3189 48.04543 6
722 13.42046 -17.11041 45.01417 6
723 14.22328 -14.37954 42.10283 6
724 8.76728 12.5725 59.28536 6
725 8.22565 17.44368 61.71996 6
726 7.9531 3.31283 52.42984 6
727 8.18729 7.71345 55.91672 6
728 9.73448 14.04655 54.76244 6
729 10.13538 14.9098 49.44567 6
730 7.81074 19.20079 52.25927 6
731 11.06694 -5.69894 47.94617 6
732 10.89535 -1.02125 50.37711 6
733 12.45585 -12.74904 39.65432 7
734 12.92768 -9.26825 43.95107 6
735 11.44722 -4.39456 44.73874 6
736 10.17356 -3.11993 42.07252 7
737 12.81337 0.94174 43.19545 7
738 9.96154 10.60784 47.2745 6
739 9.03115 15.76537 45.11687 6
740 9.16894 4.62621 48.47593 6
741 11.56955 5.95723 45.16427 6
742 13.47758 6.983 41.35221 7
743 10.49661 17.31531 41.53566 7
744 8.08329 21.30991 42.45807 6
745 12.01915 8.17064 37.84794 7
746 13.04062 12.77329 39.67438 7
747 13.03373 18.24348 37.41597 7
748 13.19585 18.45031 32.71155 7
749 12.56163 23.58102 34.73251 7
750 27.9378 -14.4518 67.69653 1
751 24.84538 -17.58958 70.52202 1
752 25.57305 -22.71546 63.12867 1
753 20.41271 -24.72256 61.57736 1
754 23.45427 -22.60791 67.33331 1
755 20.66295 -20.91013 71.15028 6
756 16.28626 -22.89107 71.62756 6
757 20.96399 -27.9243 53.01836 1
758 18.80938 -31.30282 56.2202 1
759 17.97186 -27.56984 56.56348 1
760 26.73759 -30.17309 63.90276 5
761 25.49981 -30.62885 69.59193 5
762 22.16986 -31.22346 62.1096 5
763 17.62781 -32.37877 61.30746 1
764 16.48551 -31.66018 68.06327 5
765 13.33249 -33.5046 61.84993 1
766 13.65155 -25.90927 66.82924 6
767 12.12305 -24.97063 73.11473 6
768 15.64183 -26.48098 61.36216 1
769 11.72465 -29.95343 61.5989 1
770 9.51411 -34.01229 63.88267 6
771 8.31671 -27.84805 73.05945 6
772 9.098 -36.37031 68.87852 6
773 7.15076 -32.97797 67.22932 6
774 4.9519 -31.19498 71.38052 6
775 2.7506 -34.9738 69.34247 6
776 29.36469 -34.46652 65.18457 5
777 24.52985 -35.76453 60.02538 5
778 26.10203 -34.09952 66.83124 5
779 25.99028 -37.0666 53.63749 5
780 26.72274 -42.18669 54.85131 5
781 23.52855 -38.38967 54.69108 5
782 21.22902 -39.24427 56.94401 5
783 23.30797 -43.64006 59.44585 5
784 19.83633 -40.29946 60.08726 5
785 31.88742 -42.92785 52.58555 5
786 35.70977 -45.12445 55.25838 5
787 32.06662 -44.32029 55.95897 5
788 34.56753 -46.47105 48.35807 5
789 31.6498 -48.51058 48.6368 5
790 35.76943 -47.71903 52.18483 5
791 36.22789 -48.88363 56.35125 5
792 32.1517 -52.86217 55.72491 5
793 34.98609 -50.55262 59.98954 5
794 28.30442 -44.57816 62.18147 5
795 25.81002 -45.8679 63.06097 5
796 30.61192 -44.945 59.14094 5
797 33.31252 -47.48031 62.86198 5
798 31.76644 -51.72329 62.90872 5
799 26.25482 -49.45597 61.31289 5
800 22.78209 -47.82533 60.79522 5
801 27.62049 -55.48462 61.56066 5
802 27.39822 -52.99706 63.42039 5
803 22.90802 -54.43221 62.08446 5
804 20.38961 -59.33279 64.13747 5
805 18.72791 -55.86102 60.76209 5
806 4.40588 -39.58554 72.4071 6
807 4.07087 -39.79472 66.98063 6
808 11.13509 -33.11874 75.40305 5
809 7.15556 -36.21378 75.30717 6
810 8.70731 -39.25949 74.99547 5
811 13.04124 -42.42731 74.61 5
812 12.41305 -41.02825 71.72388 5
813 20.12537 -32.40646 72.63383 5
814 16.02533 -31.40487 74.58835 5
815 22.92114 -33.3703 69.74315 5
816 19.22447 -36.15599 65.7195 5
817 18.37883 -41.29338 63.48998 5
818 15.44106 -41.89455 72.65579 5
819 14.26234 -47.24583 70.91643 5
820 13.92944 -35.75059 74.15926 5
821 16.49935 -41.5524 67.80559 5
822 18.21714 -45.36205 61.88903 5
823 15.77566 -50.12447 66.20973 5
824 12.5939 -50.81383 68.67139 5
825 18.01885 -48.6202 62.01653 5
826 16.14615 -51.25687 59.70066 5
827 14.85814 -56.73777 60.29787 5
828 7.61621 -40.15315 65.0565 6
829 11.60036 -46.09307 68.75579 5
830 12.3492 -40.04292 68.0948 4
831 12.33485 -39.66691 64.02646 4
832 14.24502 -43.70004 62.20391 4
833 10.75716 -52.91332 63.74327 5
834 9.41366 -50.60888 68.12953 5
835 12.75548 -61.08569 62.9462 5
836 12.44433 -56.93341 60.00189 5
837 10.74774 -55.70711 59.27228 5
838 8.7823 -60.32288 58.43124 4
839 9.57571 -54.67126 58.78416 4
840 9.98523 -48.5053 62.41663 4
841 12.44246 -47.37768 59.01109 4
842 8.06709 -49.48799 65.8286 4
843 6.71636 -51.53313 61.87718 4
844 8.74553 -53.3465 57.53779 4
845 9.43039 -49.12687 55.86166 4
846 7.66429 -57.10218 54.18462 4
847 7.34666 -51.85393 55.72797 4
848 6.27038 -49.96986 53.36317 4
849 8.65404 -53.00041 50.33343 4
850 28.99169 -14.51875 60.68301 1
851 31.78681 -15.29197 66.62189 1
852 35.42874 -11.00568 61.17496 1
853 39.01874 -14.78927 63.80912 1
854 35.64041 -15.16766 65.75384 1
855 32.26049 -20.9208 67.33035 1
856 29.10328 -22.89971 61.13124 1
857 41.39427 -9.44944 58.00389 1
858 37.69504 -13.46375 55.14109 1
859 40.08692 -14.35777 59.62506 1
860 40.40146 -10.70082 48.01109 1
861 35.42531 -13.49731 43.71853 1
862 36.10632 -13.46282 49.18754 1
863 34.80726 -17.2952 50.15078 1
864 33.9431 -21.76592 45.96026 1
865 35.39874 -22.73358 49.19949 1
866 31.8679 -23.78226 57.90254 1
867 24.67163 -23.2379 53.65352 1
868 37.98983 -20.68683 59.62772 1
869 34.23774 -24.10147 53.67375 1
870 30.62365 -25.50308 48.13577 1
871 24.16991 -27.10818 50.67504 1
872 32.04485 -28.43073 49.4696 1
873 27.79501 -27.73183 49.46799 1
874 26.92769 -29.36105 55.40178 1
875 30.88401 -29.84104 64.049 5
876 41.22372 -12.76234 38.2184 1
877 38.22953 -14.89689 34.18059 1
878 36.31765 -14.64669 38.1452 1
879 42.85166 -9.70257 30.68727 2
880 45.13077 -14.0419 30.94998 2
881 41.01979 -14.30671 31.76493 2
882 41.68929 -18.81663 35.40297 2
883 47.72318 -17.57544 42.63982 2
884 43.26751 -19.11658 41.77016 2
885 49.92572 -11.29195 27.07794 2
886 55.93898 -11.44819 33.64074 2
887 50.73404 -13.41576 31.86229 2
888 59.92485 -8.25746 29.23458 2
889 60.55044 -11.8004 31.96827 2
890 59.73116 -9.90732 34.24291 2
891 58.38744 -12.50111 37.99759 2
892 54.69791 -17.08255 35.17601 2
893 56.79016 -15.23181 39.75299 2
894 51.88696 -15.45292 42.92179 2
895 52.87638 -14.92303 48.40636 2
896 50.86843 -14.42336 37.33635 2
897 55.57213 -13.72552 42.57619 2
898 54.1197 -17.72803 41.75287 2
899 53.13419 -18.81408 48.01313 2
900 53.1135 -17.03418 51.77174 2
901 50.07244 -21.06076 37.78983 2
902 51.59846 -19.91047 43.17528 2
903 48.62102 -22.03654 43.23127 2
904 45.64953 -25.52801 37.75794 2
905 45.39277 -24.1557 42.26569 5
906 35.85481 -30.1254 64.6523 5
907 33.60137 -32.96852 67.57643 5
908 37.05406 -26.92111 51.48945 1
909 37.06627 -29.1268 57.78056 5
910 40.55871 -29.42715 64.21222 5
911 44.26058 -28.75432 61.8428 5
912 40.61991 -33.66341 60.32819 5
913 34.36597 -20.97776 42.84049 1
914 37.88076 -24.63741 46.03326 1
915 33.24998 -17.42599 39.85663 1
916 37.73245 -19.53524 40.86775 1
917 43.97376 -17.47843 48.81466 5
918 45.21383 -22.72412 60.37772 5
919 46.4887 -27.60962 57.58464 5
920 42.52478 -23.53794 54.13947 5
921 45.72199 -18.93917 55.72802 5
922 49.47581 -16.48078 54.97218 5
923 46.67504 -26.26535 52.92858 5
924 42.1593 -30.15409 51.65046 5
925 50.11448 -21.33461 52.91777 5
926 45.86994 -25.06197 47.53338 5
927 42.10098 -26.54284 41.80363 5
928 32.79652 -35.1008 62.30246 5
929 37.32812 -34.13641 54.65911 5
930 35.90248 -35.31603 58.84938 5
931 30.47056 -35.24212 56.50885 5
932 28.35389 -36.69801 51.76409 5
933 38.0931 -30.87342 45.71783 5
934 38.1539 -32.54276 50.3633 5
935 40.99736 -29.67532 37.93694 5
936 38.45934 -28.71488 40.99971 5
937 35.13799 -31.26557 40.42588 5
938 35.94011 -34.58687 38.14728 5
939 32.72731 -34.49811 40.67475 5
940 29.80486 -36.74379 48.83852 5
941 29.14947 -40.70378 49.79758 5
942 33.83735 -34.43782 49.50381 5
943 31.05661 -35.83456 44.76336 5
944 31.18105 -38.42234 41.80259 5
945 31.86056 -42.90226 48.25853 5
946 31.97391 -40.69104 38.73161 5
947 30.89286 -42.12291 43.71941 5
948 32.5514 -44.47154 46.36422 5
949 32.82874 -45.70251 43.16125 5
950 24.04135 -12.62638 54.69814 1
951 27.80727 -13.6971 54.17139 1
952 23.30925 -5.39783 46.82836 1
953 26.27182 -6.36367 44.77465 1
954 26.35338 -11.3915 48.31044 1
955 31.34208 -12.18951 54.31696 1
956 34.12897 -9.65345 55.38412 1
957 27.74266 4.51807 49.14365 1
958 29.65335 3.86013 52.82011 1
959 27.88161 -0.90742 47.51765 1
960 32.13887 14.33106 49.34328 1
961 35.12596 14.76222 51.41055 1
962 33.52089 9.36552 54.51555 1
963 33.86236 4.03645 55.17814 1
964 38.0187 4.61581 54.23476 1
965 34.47033 1.11349 48.90016 1
966 33.45536 -8.23256 48.65725 1
967 38.12777 -7.29839 56.05831 1
968 29.85395 -5.64056 44.74736 1
969 33.27117 -3.87714 44.3066 1
970 37.15874 -3.62725 43.87417 1
971 42.25669 -6.36906 55.02936 1
972 41.91701 -2.92813 44.09948 1
973 41.79717 -5.63871 49.01712 1
974 44.80447 -7.68543 52.81269 1
975 45.76861 -8.8012 48.79192 1
976 32.00894 23.65193 46.62986 1
977 35.54837 24.82755 46.53261 1
978 35.42035 20.49014 48.12315 1
979 33.5216 29.39663 40.23874 1
980 35.95348 27.36629 37.08178 1
981 36.21685 27.21248 42.40577 1
982 37.18472 22.22421 42.40079 1
983 39.69218 20.75886 39.14615 1
984 41.81673 18.80381 42.34912 1
985 34.75925 31.05544 32.35978 1
986 39.39295 31.30035 31.43198 1
987 36.52841 27.91238 32.29013 1
988 37.99828 36.43018 25.58774 1
989 42.87177 37.67702 25.17154 1
990 41.46212 33.49348 28.73766 1
991 44.73353 29.57059 30.02037 1
992 47.71338 28.11115 28.3759 1
993 47.26419 25.34044 31.98473 1
994 40.63706 22.48655 35.24473 1
995 37.43587 18.55166 35.5411 1
996 39.31231 25.22221 33.54365 1
997 44.16234 23.5507 33.04853 1
998 43.30421 21.06007 30.40841 1
999 34.92803 16.42311 31.80874 1
1000 35.4722 13.62179 35.00136 1
1001 39.39454 21.5632 26.90549 1
1002 37.28793 18.4579 28.25922 1
1003 33.21521 13.94398 27.5329 1
1004 34.98733 11.62162 24.08734 1
1005 33.39847 7.60847 27.0273 1
1006 50.08218 -4.72312 48.5989 1
1007 46.47018 -9.14404 42.92493 1
1008 42.08901 1.68096 47.03614 1
1009 46.99044 -0.88971 46.12055 1
1010 50.68261 0.02257 45.47647 1
1011 47.86356 0.23409 40.76856 1
1012 54.01938 -1.06538 41.81808 1
1013 39.32011 10.62194 51.70394 1
1014 40.30218 5.62976 50.46668 1
1015 39.28833 15.89182 50.58259 1
1016 41.4436 14.88471 46.69045 1
1017 39.4063 12.79611 42.94359 1
1018 40.52485 2.20992 40.27605 1
1019 43.18892 -0.47964 36.42197 1
1020 39.77955 4.92122 45.1713 1
1021 37.70577 7.2083 42.16679 1
1022 36.95694 10.01813 38.60874 1
1023 39.19003 1.5133 33.8333 1
1024 46.57684 0.39761 32.86984 1
1025 34.91589 6.96945 35.02432 1
1026 35.21528 3.86893 30.89894 1
1027 38.67697 3.39324 26.80153 1
1028 46.85435 -8.53227 38.40413 1
1029 55.97318 -1.10178 38.0257 1
1030 52.43104 -4.91656 38.93894 1
1031 47.44048 -8.03977 34.13425 1
1032 47.64095 -6.99211 29.96736 2
1033 49.10339 3.40057 31.1944 1
1034 53.40272 0.95715 33.78431 1
1035 42.87539 4.01611 23.89334 1
1036 44.47642 4.35132 27.91455 1
1037 51.36675 6.71207 29.7154 1
1038 55.82891 6.57076 25.70052 2
1039 58.24479 5.76066 28.41948 2
1040 53.26472 -3.83536 29.77297 2
1041 48.58635 -7.09293 25.44074 2
1042 57.26107 -0.10776 33.97433 1
1043 58.03621 0.43331 29.89996 2
1044 58.05872 0.01036 25.19284 2
1045 51.55138 -8.72427 23.04933 2
1046 57.87774 -1.41551 19.58814 2
1047 54.27727 -5.31831 20.20859 2
1048 56.3881 -9.94569 23.27126 2
1049 61.31759 -8.15207 23.69188 2
1050 21.68463 -8.77899 55.16248 6
1051 22.95984 0.49566 59.93322 6
1052 21.37732 -4.09663 57.23467 6
1053 21.9635 -4.99226 51.85387 6
1054 22.22671 -0.25129 49.23881 1
1055 20.67363 9.78467 61.46906 6
1056 22.56805 5.66671 61.69291 6
1057 14.62135 16.07417 59.15964 6
1058 17.71625 13.37969 60.34111 6
1059 20.31592 14.31236 57.88514 6
1060 21.30265 18.60139 56.18303 6
1061 20.89183 13.91954 54.09313 6
1062 21.64501 4.772 51.07373 6
1063 24.08619 4.46016 47.22125 1
1064 21.5756 5.16839 56.67907 6
1065 20.7866 9.37654 52.03187 6
1066 21.87217 12.88151 48.34327 6
1067 27.28522 8.14642 46.74237 1
1068 22.5683 15.89807 45.67368 1
1069 24.9165 11.75385 44.85639 1
1070 29.12841 12.46747 46.40491 1
1071 29.50457 17.10424 44.94959 1
1072 7.69627 22.99098 58.26181 6
1073 10.56238 19.83464 59.03955 6
1074 8.30952 25.43948 49.16396 6
1075 7.09403 24.40671 54.17397 6
1076 7.28865 29.43827 55.63406 6
1077 7.25867 35.25541 51.3092 6
1078 9.9853 31.68614 53.04351 6
1079 8.28579 27.47266 38.16215 7
1080 8.36639 26.49548 42.99581 6
1081 13.58079 28.55579 30.14697 7
1082 10.25668 28.23357 34.33255 7
1083 8.1563 32.73475 33.70233 7
1084 9.30645 37.9478 29.92481 7
1085 8.82851 38.00597 34.30231 7
1086 6.94733 36.87502 46.10567 6
1087 7.08744 41.60824 47.01817 6
1088 8.27393 31.83087 44.67801 6
1089 8.54163 37.92199 40.10519 6
1090 8.49309 43.43366 35.35817 6
1091 7.715 47.51083 42.15557 6
1092 9.80494 42.90012 44.5084 6
1093 8.39334 48.25001 29.88973 7
1094 7.50707 48.59855 36.50102 6
1095 8.24001 52.3662 36.05005 6
1096 8.89501 56.25676 29.91125 6
1097 10.94373 51.5769 32.56866 6
1098 25.72591 20.07203 41.17436 1
1099 29.00143 22.09022 44.00837 1
1100 19.69557 21.68701 47.20397 6
1101 21.48539 20.34154 42.49392 1
1102 22.97923 24.5012 39.80171 1
1103 20.79467 29.39232 39.27074 1
1104 23.87416 27.62387 35.86284 1
1105 17.95986 23.16893 54.84184 6
1106 20.71992 23.23329 52.82934 6
1107 13.87694 21.04851 55.3117 6
1108 14.0404 27.52083 53.3484 6
1109 13.90888 32.8542 50.19987 6
1110 19.45288 31.93187 43.82956 1
1111 19.80729 35.67365 39.63018 1
1112 19.84584 28.67652 48.02491 6
1113 17.54576 34.00642 48.34591 6
1114 13.87113 38.48711 46.36414 6
1115 18.53566 42.42895 38.97442 1
1116 19.59676 39.58883 34.45815 1
1117 14.06809 42.41146 40.56932 6
1118 14.88914 47.52664 36.19387 6
1119 16.42184 49.55322 29.60941 1
1120 29.84286 26.35994 42.18636 1
1121 24.43213 31.35875 33.83348 1
1122 27.60063 28.19853 37.3183 1
1123 30.55925 29.38309 39.34644 1
1124 30.58693 31.49719 37.05595 1
1125 21.05936 43.6467 31.06347 1
1126 21.80952 37.04934 32.15278 1
1127 17.37949 52.89288 24.96753 1
1128 21.04957 50.17083 30.68407 1
1129 24.82323 46.8746 30.44565 1
1130 22.96204 48.71059 24.74848 1
1131 25.69695 43.09139 28.86396 1
1132 28.37943 33.38257 32.83204 1
1133 31.68562 32.52418 33.6835 1
1134 25.02576 34.89806 32.51601 1
1135 26.90459 37.49045 30.65738 1
1136 25.39472 38.1773 25.07518 1
1137 32.50081 32.50342 28.48954 1
1138 25.64552 40.392 19.44818 1
1139 29.04008 35.34484 23.07899 1
1140 33.83341 35.85716 23.75568 1
1141 34.05745 41.29702 22.86973 1
1142 12.81617 26.63514 25.57236 7
1143 14.61992 31.28742 25.18537 7
1144 7.75295 34.25743 18.63297 7
1145 13.51512 35.92025 15.73101 7
1146 14.24664 33.47982 20.17454 7
1147 13.20358 36.54325 25.35588 7
1148 9.9126 40.52459 24.92813 7
1149 7.28495 38.35417 9.28906 7
1150 12.12412 40.44415 6.57519 7
1151 12.43594 38.38967 11.06651 7
1152 7.48437 38.21188 -1.16082 7
1153 12.19269 39.61729 -2.76412 7
1154 12.30464 40.20905 1.9447 7
1155 16.08928 43.62477 5.29806 7
1156 13.03526 48.76166 4.66589 7
1157 13.86235 48.02368 9.77132 7
1158 11.78321 43.84054 19.86158 7
1159 6.85009 45.15067 24.49237 7
1160 14.83616 41.19418 15.00689 7
1161 11.91152 45.87026 14.04827 7
1162 9.09238 49.76395 13.55666 7
1163 9.58403 51.18488 24.90709 7
1164 8.74161 54.88992 13.94796 7
1165 8.74998 53.14259 18.8835 7
1166 8.16322 56.67519 24.90704 7
1167 9.20191 59.74513 24.07982 6
1168 10.21104 33.70393 -9.17019 7
1169 8.16314 39.97396 -11.37626 7
1170 11.64697 39.25357 -8.22189 7
1171 5.91447 33.98348 -16.61153 7
1172 6.39241 40.3531 -19.58194 7
1173 8.3654 39.75246 -14.8189 7
1174 10.5492 45.26162 -12.14421 7
1175 8.08567 51.32378 -14.21894 7
1176 11.33045 50.06026 -8.60511 7
1177 4.77963 32.20516 -25.40312 7
1178 7.97997 37.1183 -22.39508 7
1179 5.13438 39.38124 -23.94653 7
1180 10.88813 28.41546 -18.22395 7
1181 14.93299 30.13847 -19.97419 7
1182 12.16378 34.43592 -18.7047 7
1183 13.06272 39.59019 -20.1108 7
1184 13.30866 39.05675 -25.38107 7
1185 12.15826 44.17353 -23.16233 7
1186 5.9417 50.56173 -20.03905 7
1187 6.59251 56.28276 -17.40995 7
1188 5.43906 45.09603 -21.32172 7
1189 9.13965 48.1619 -20.60091 7
1190 12.7809 48.91676 -22.5099 7
1191 10.2825 58.12194 -17.84089 7
1192 6.9975 60.30695 -13.28795 7
1193 16.44773 47.26949 -16.11889 7
1194 13.52485 53.42815 -17.56241 7
1195 17.0517 57.86904 -15.09939 7
1196 23.68606 56.14203 -12.95106 7
1197 20.34306 58.88268 -11.44325 7
1198 10.63527 62.08729 17.49097 7
1199 13.1251 57.61863 21.47069 1
1200 10.96102 58.3824 8.62925 7
1201 9.5637 62.17934 12.8978 7
1202 13.39698 64.0861 11.47011 7
1203 13.54754 62.224 5.03149 7
1204 18.75376 60.78881 10.02176 1
1205 11.63972 49.22268 -0.37205 7
1206 10.40388 53.22981 4.05435 7
1207 12.52944 44.34931 -4.74652 7
1208 9.80321 49.30189 -4.19465 7
1209 9.2391 55.4338 -4.70042 7
1210 10.39002 64.53084 2.18449 7
1211 15.54566 64.70522 -0.19232 7
1212 9.49005 59.46257 3.84516 7
1213 8.92859 61.51453 -1.85959 7
1214 7.29388 62.26247 -7.43682 7
1215 15.9208 62.03961 -4.10984 7
1216 21.62967 61.32388 0.04867 1
1217 10.16208 63.00203 -8.78321 7
1218 15.94853 57.34737 -7.20079 7
1219 22.86057 54.19216 -7.32439 7
1220 18.4298 54.9118 19.83872 1
1221 22.91155 59.02798 10.36243 1
1222 20.55049 59.11671 15.42894 1
1223 23.12011 54.9624 20.64603 1
1224 23.63558 50.48346 19.23884 1
1225 22.08748 54.04106 1.23439 1
1226 23.79864 57.81729 5.28319 1
1227 29.23389 53.26164 -6.8326 1
1228 23.99726 50.23828 -3.59946 1
1229 26.71063 48.90648 1.39602 1
1230 32.64495 50.67171 3.10125 1
1231 29.68884 47.51254 5.19298 1
1232 23.46193 50.81646 13.85944 1
1233 24.38947 45.97996 16.77917 1
1234 24.14978 54.53487 9.61841 1
1235 26.0294 48.96143 9.4715 1
1236 31.41542 48.79197 9.92049 1
1237 29.41797 44.47147 16.59052 1
1238 36.0841 50.63212 11.53784 1
1239 32.6626 48.71946 14.9361 1
1240 33.33854 45.88427 20.12988 1
1241 37.30654 45.93138 21.51278 1
1242 10.21562 21.73022 28.91809 7
1243 7.93519 26.04687 25.94421 7
1244 5.68095 17.0753 26.98049 7
1245 7.81919 19.83989 23.39028 7
1246 6.15387 23.18189 24.45897 7
1247 6.08347 28.90911 21.58516 7
1248 7.42538 30.7411 17.07131 7
1249 2.35557 9.39098 26.18111 7
1250 -0.07224 10.75776 22.31239 -1
1251 3.71675 15.44561 23.08918 7
1252 0.65831 -1.16592 23.01352 -1
1253 1.25199 -0.6086 18.76191 -1
1254 1.0446 5.11941 20.29166 -1
1255 1.01926 11.32062 17.71233 -1
1256 1.22018 11.36916 13.19429 -1
1257 0.27198 17.26744 15.05568 -1
1258 6.35723 26.47562 15.60235 7
1259 8.38104 32.02682 11.99572 7
1260 4.8079 21.14542 19.43124 7
1261 0.43023 22.98413 16.50817 7
1262 -0.12955 23.55446 11.73284 -1
1263 7.41874 32.96541 7.52412 7
1264 0.54261 23.84284 7.12021 -1
1265 0.22901 30.53969 8.17375 -1
1266 5.90331 33.09206 2.92846 7
1267 6.62687 32.29122 -2.14577 7
1268 1.26198 -12.57192 18.40335 -1
1269 2.65604 -12.51517 14.14682 -1
1270 1.5383 -7.26378 16.37996 -1
1271 3.9992 -23.12873 14.51706 -1
1272 6.30197 -23.17311 11.67649 -1
1273 4.20075 -18.0196 13.14345 -1
1274 3.06012 -12.80753 10.83495 -1
1275 2.01422 -15.46447 6.57644 -1
1276 3.11287 -8.12595 8.18403 -1
1277 6.48436 -31.89971 10.1911 -1
1278 10.17333 -32.48011 7.6046 -1
1279 8.30898 -28.03475 9.91141 -1
1280 11.99924 -39.73176 4.77443 3
1281 16.39733 -39.37069 3.92204 -1
1282 13.77686 -36.0202 5.80648 -1
1283 14.61324 -34.74452 4.51941 -1
1284 20.81041 -35.21867 3.74042 -1
1285 13.39389 -34.37526 0.42231 -1
1286 4.1539 -23.2768 4.12498 -1
1287 3.74114 -20.29801 1.21109 -1
1288 6.49417 -25.32165 6.86096 -1
1289 8.18857 -28.68892 1.37501 -1
1290 12.313 -30.84667 -2.68878 -1
1291 4.66783 -24.68268 -4.15208 -1
1292 3.7494 -17.78436 -2.08056 -1
1293 17.82099 -31.53484 -4.33543 -1
1294 11.98954 -26.37459 -3.86618 -1
1295 9.46486 -25.77934 -8.42357 -1
1296 13.41248 -24.10869 -10.17379 -1
1297 4.67067 -23.74944 -13.74467 -1
1298 1.74439 26.46634 -2.46467 7
1299 5.38572 30.67575 -7.23106 7
1300 1.77505 17.15599 5.34022 -1
1301 0.76195 21.83946 2.10999 -1
1302 1.15643 18.98915 -2.4808 -1
1303 3.45366 11.05197 -2.64275 -1
1304 4.6121 17.19316 -5.4913 7
1305 1.92991 3.56288 10.89468 -1
1306 1.52367 9.90397 8.24023 -1
1307 1.79262 -1.43706 13.88949 -1
1308 2.45901 -2.77179 9.05364 -1
1309 4.37933 -3.35729 5.1685 -1
1310 2.81869 4.25779 -0.6158 -1
1311 2.51836 0.66969 -4.70631 -1
1312 2.11991 7.57306 3.5891 -1
1313 2.92471 -0.24695 1.49617 -1
1314 2.79956 -8.21323 -0.20423 -1
1315 3.62672 -8.77133 -7.3393 -1
1316 3.80962 -1.89815 -8.10975 -1
1317 3.59249 -14.12618 -5.23542 -1
1318 1.53179 -18.3881 -10.7503 -1
1319 3.65204 -19.9424 -18.0422 -1
1320 7.18181 28.09398 -10.03695 7
1321 6.29994 15.5663 -8.02728 7
1322 6.14027 22.03385 -9.80475 7
1323 7.91854 27.16271 -14.21233 7
1324 5.85878 26.68882 -17.99487 7
1325 3.44539 -4.21836 -12.40128 -1
1326 5.61689 4.77281 -8.15556 -1
1327 10.0687 -19.52631 -20.38174 -1
1328 5.06355 -12.24306 -14.26719 -1
1329 5.00508 -4.23445 -15.33793 -1
1330 9.07404 -5.07893 -14.76521 -1
1331 8.09716 -0.21986 -13.50034 -1
1332 6.82081 19.96614 -17.5715 7
1333 4.85748 25.83388 -23.11479 7
1334 7.4207 13.42364 -10.58133 7
1335 7.56101 11.54068 -13.17744 7
1336 8.34432 8.88951 -14.78449 7
1337 5.55298 23.68889 -25.05759 7
1338 10.93577 5.90534 -14.56988 7
1339 7.71012 15.7212 -20.60849 7
1340 8.24563 22.65887 -21.48931 7
1341 11.12194 21.04721 -15.50197 7
1342 9.38519 17.03222 32.4316 7
1343 8.46838 6.31682 38.06958 7
1344 8.884 11.87121 35.2975 7
1345 6.04159 15.38434 32.37605 7
1346 5.36077 11.88735 30.03183 7
1347 7.7808 -5.48318 41.06793 7
1348 7.68756 0.11476 40.48894 7
1349 9.85705 -16.39771 38.73796 4
1350 8.66974 -10.78004 39.96911 7
1351 5.42243 -8.2863 39.62318 7
1352 4.01802 -11.5696 36.17184 4
1353 4.01494 -5.40809 35.33443 7
1354 5.06956 6.37422 32.62249 7
1355 7.49202 8.29088 29.07759 7
1356 4.93801 4.09787 38.09859 7
1357 4.4848 0.59167 34.29345 7
1358 6.74508 -3.49569 32.90832 7
1359 3.44835 4.08206 28.42126 7
1360 6.65382 -8.22194 31.2365 7
1361 5.07381 -2.00963 30.22228 7
1362 0.22237 -0.8917 28.01411 -1
1363 -0.00204 -6.41825 25.51726 -1
1364 10.79902 -29.40412 38.10848 4
1365 10.74414 -23.59684 37.77769 4
1366 10.68343 -38.67886 40.86583 4
1367 11.26573 -34.51571 39.44194 4
1368 6.98978 -33.54549 41.56172 4
1369 6.33679 -36.10256 38.87756 4
1370 4.80344 -32.05958 39.79717 4
1371 6.69986 -46.09769 42.80852 4
1372 7.85544 -42.65309 42.38377 4
1373 10.42259 -52.36187 44.78707 4
1374 9.74001 -48.44468 44.14103 4
1375 12.19977 -48.49021 41.02599 4
1376 13.55247 -52.69787 38.2785 4
1377 14.72347 -48.13392 37.77666 4
1378 8.93448 -39.78513 37.60255 4
1379 9.0443 -38.61938 33.79393 4
1380 6.25592 -41.68224 40.38734 4
1381 12.18778 -43.69695 37.28386 4
1382 15.2265 -47.4545 33.37149 4
1383 9.10876 -43.87391 31.19418 4
1384 6.05027 -39.57311 31.83869 4
1385 12.49347 -52.19441 30.79824 4
1386 11.98906 -47.84855 30.70218 4
1387 7.89639 -49.11275 29.05897 4
1388 9.3702 -52.47713 23.85646 4
1389 5.68336 -49.50571 25.60853 4
1390 -0.05093 -13.22572 27.58301 -1
1391 0.4172 -13.23432 22.63371 -1
1392 7.3877 -15.40656 31.44332 4
1393 4.42829 -14.12309 29.39736 4
1394 1.81498 -20.3796 27.48795 4
1395 4.51863 -27.3794 27.04024 4
1396 0.08398 -27.26835 25.3054 -1
1397 4.39676 -18.72687 37.3224 4
1398 4.14546 -16.72151 32.60702 4
1399 7.07693 -21.43596 39.27114 4
1400 4.95068 -25.74908 38.64085 4
1401 5.28908 -29.83507 34.86198 4
1402 8.34103 -27.91737 29.26703 4
1403 7.81019 -33.92154 27.15087 4
1404 6.94895 -22.16255 31.32227 4
1405 5.52659 -28.34355 30.51391 4
1406 4.27743 -34.05201 30.84516 4
1407 8.60276 -39.54218 27.09889 4
1408 6.55076 -39.27497 24.37736 4
1409 4.85696 -39.30574 28.47395 4
1410 5.26139 -44.55745 26.06908 4
1411 4.74729 -48.47926 21.00503 4
1412 0.98999 -19.09659 20.11537 -1
1413 -0.04405 -32.90298 22.19346 -1
1414 0.40071 -25.77145 21.25035 -1
1415 1.84754 -24.57386 17.50712 -1
1416 2.5304 -29.45525 14.81552 -1
1417 6.94693 -43.75477 20.64308 4
1418 2.05159 -39.10009 22.20269 -1
1419 6.46192 -54.24258 16.16759 4
1420 6.6765 -47.97403 18.30371 4
1421 8.28516 -47.63561 15.85803 3
1422 6.64009 -51.79293 10.67359 3
1423 8.24236 -46.36274 13.14428 3
1424 1.02427 -36.13972 13.13191 -1
1425 2.23748 -33.42209 9.84412 -1
1426 0.61361 -38.10964 17.80911 -1
1427 1.66426 -42.94484 13.28803 -1
1428 7.55459 -44.93042 10.30493 3
1429 3.70909 -37.59931 6.00346 -1
1430 9.13586 -48.85692 6.55091 3
1431 7.83913 -43.44737 7.80597 3
1432 9.54698 -41.70869 6.01333 3
1433 11.3692 -45.42182 2.83812 3
1434 8.26715 -55.18929 45.95405 4
1435 8.9091 -55.72267 42.73942 4
1436 7.21029 -63.86096 41.63169 4
1437 5.35856 -64.37824 38.86994 4
1438 9.01173 -59.85165 40.5021 4
1439 9.84423 -56.03968 39.26421 4
1440 10.37574 -56.05657 36.141 4
1441 9.36585 -71.58693 39.94622 4
1442 12.28708 -68.76558 37.99065 4
1443 6.53792 -69.66415 36.99249 4
1444 18.81127 -75.2313 38.80399 3
1445 20.23821 -76.72078 33.78452 3
1446 18.16023 -70.07948 36.79273 4
1447 14.47791 -66.69753 35.23683 4
1448 16.58164 -64.39848 32.6657 3
1449 10.25728 -65.58195 32.6436 4
1450 6.73655 -59.5437 34.44441 4
1451 9.70118 -55.60258 32.82098 4
1452 5.80069 -65.46638 35.56396 4
1453 5.23142 -66.29479 32.0144 4
1454 6.17841 -66.6086 28.78787 4
1455 8.47691 -56.37904 29.41257 4
1456 9.39212 -64.53267 26.64394 4
1457 4.79919 -61.40988 27.06088 4
1458 6.98289 -56.96621 25.59121 4
1459 5.21611 -57.68186 21.73967 4
1460 12.87384 -84.06618 36.88146 3
1461 6.86231 -81.77406 33.54721 3
1462 13.50342 -81.16396 32.43766 3
1463 8.65269 -87.70322 28.02516 3
1464 8.07812 -86.55647 21.10253 3
1465 5.87223 -84.68436 28.54943 3
1466 4.86072 -79.57507 28.05986 3
1467 3.9835 -78.83372 22.26563 3
1468 6.88558 -75.77268 25.31722 3
1469 13.61747 -91.48677 14.27854 3
1470 10.20996 -96.02745 13.47492 3
1471 9.55012 -89.87563 13.50366 3
1472 17.60471 -100.30144 10.53853 3
1473 15.84495 -101.50388 4.15037 3
1474 11.6991 -100.6394 10.49249 3
1475 9.21837 -99.04008 10.47031 3
1476 13.82961 -98.32415 4.69268 3
1477 8.61645 -95.92558 7.70717 3
1478 7.25561 -83.77847 16.30862 3
1479 5.95924 -78.59329 16.10023 3
1480 5.62538 -88.55229 15.45361 3
1481 4.59283 -90.10454 9.65996 3
1482 7.84057 -91.34886 6.09872 3
1483 5.78912 -80.11668 10.24732 3
1484 3.25912 -73.6591 14.67642 3
1485 13.4628 -90.12396 5.07944 3
1486 8.84195 -87.02473 8.24341 3
1487 12.63683 -82.79084 10.09408 3
1488 15.06253 -82.58546 3.65464 3
1489 14.12783 -79.38337 11.01404 3
1490 8.87461 -59.90224 22.39144 4
1491 5.76102 -59.10992 17.67442 4
1492 16.91021 -61.0933 27.44763 3
1493 13.93802 -61.0903 24.4788 4
1494 17.85219 -57.55944 22.89135 3
1495 24.13564 -61.33576 18.9338 3
1496 20.32094 -56.65606 18.97708 3
1497 19.98444 -72.40082 27.26457 3
1498 20.4872 -65.33942 28.66743 3
1499 17.2495 -78.06796 28.18872 3
1500 13.51032 -77.91041 23.04967 3
1501 11.14463 -72.84759 21.26488 3
1502 22.17946 -67.88345 16.47232 3
1503 19.49145 -65.4344 12.66742 3
1504 21.99644 -67.21269 22.83828 3
1505 16.48515 -70.47334 17.60102 3
1506 6.23901 -68.48389 16.49652 3
1507 13.7383 -65.07845 9.03525 3
1508 19.55028 -65.06375 7.91486 3
1509 6.45314 -67.45794 12.32839 3
1510 11.32042 -72.00544 14.55807 3
1511 14.85982 -75.78236 11.04297 3
1512 7.92732 -57.35604 15.41286 3
1513 20.93513 -57.93404 14.25831 3
1514 14.77269 -54.83684 17.51967 3
1515 9.11123 -55.13799 13.04852 3
1516 11.33718 -53.65304 10.83163 3
1517 21.58644 -68.52797 7.83173 3
1518 22.73392 -63.88564 8.02032 3
1519 11.70898 -73.71706 6.88851 3
1520 18.0096 -72.9926 7.61182 3
1521 22.21607 -69.81886 4.61966 3
1522 18.50414 -67.03584 2.19038 3
1523 26.17432 -65.09801 3.37863 3
1524 19.05515 -56.35737 9.01421 3
1525 13.60761 -53.55311 8.17103 3
1526 22.66286 -60.12112 8.75048 3
1527 26.08015 -60.16868 6.66598 3
1528 27.61862 -58.91661 3.00971 3
1529 15.57695 -51.37001 6.29056 3
1530 25.91918 -56.59681 0.2658 3
1531 23.56563 -53.07047 4.47977 3
1532 16.90249 -49.38542 3.7931 3
1533 16.61632 -47.13091 0.88316 3
1534 7.11001 -57.04848 48.27537 4
1535 5.68194 -61.19909 53.28953 4
1536 5.98762 -59.24387 50.82706 4
1537 8.78663 -61.1372 46.93935 4
1538 6.84398 -66.27429 43.6853 4
1539 8.39412 -64.83348 58.17867 5
1540 6.29063 -63.54738 55.74326 4
1541 14.243 -64.17492 60.66631 5
1542 10.86767 -64.93516 60.19288 5
1543 9.74652 -68.24722 55.40749 5
1544 12.38022 -70.93463 53.12907 5
1545 9.60519 -71.34758 51.52486 4
1546 6.7254 -68.53245 46.04876 4
1547 6.78031 -71.34347 42.49355 4
1548 7.42182 -65.55688 51.22433 4
1549 7.59088 -70.29008 48.84603 4
1550 10.3062 -73.67178 48.15873 4
1551 11.40715 -72.76566 42.96412 4
1552 14.9089 -73.77686 46.04964 4
1553 13.65974 -74.18335 44.97321 4
1554 17.07245 -74.74947 41.64066 4
1555 18.71742 -77.8954 42.51451 3
1556 21.40431 -59.49197 58.81347 5
1557 18.47796 -61.98129 60.22085 5
1558 26.44298 -54.68504 55.17313 5
1559 23.78546 -56.65683 57.48131 5
1560 21.57127 -58.66042 52.76303 5
1561 24.53322 -59.60757 48.73059 5
1562 21.64785 -61.09295 50.454 5
1563 28.73096 -52.89241 49.4611 5
1564 28.34681 -54.21302 52.54005 5
1565 29.06306 -50.30304 41.49885 5
1566 28.44999 -51.27027 45.75222 5
1567 28.61394 -55.22188 43.45107 5
1568 32.89899 -58.39426 42.02299 5
1569 30.49085 -58.8372 44.77752 5
1570 27.03088 -59.01622 47.48563 5
1571 27.76893 -60.87966 45.70807 5
1572 25.57867 -56.27172 48.7256 5
1573 28.67149 -58.92566 46.65212 5
1574 31.33553 -62.4934 45.91021 5
1575 29.35768 -62.52847 40.33025 5
1576 26.48633 -60.70382 40.7441 5
1577 34.38367 -65.2095 43.46751 5
1578 32.34454 -64.24068 40.9533 5
1579 32.59883 -65.42166 36.61776 5
1580 33.84269 -70.67896 34.57826 8
1581 33.08981 -66.54466 30.81674 5
1582 22.00378 -79.44759 43.32999 3
1583 19.15419 -83.82484 39.90676 3
1584 16.72407 -71.70454 45.79247 5
1585 20.09599 -74.00491 44.05832 3
1586 24.1361 -78.2178 39.62655 3
1587 25.1545 -75.11835 35.21011 3
1588 23.34438 -84.03532 33.43717 3
1589 15.89652 -67.6595 52.97695 5
1590 16.67349 -70.4034 51.03981 5
1591 15.28198 -63.80087 55.53618 5
1592 18.7426 -64.0079 52.15281 5
1593 22.73159 -63.76262 49.01302 5
1594 21.69767 -67.9168 37.65747 5
1595 25.763 -69.46183 31.11912 3
1596 18.84994 -67.95247 44.87906 5
1597 20.14724 -63.91935 43.14534 5
1598 22.63111 -60.83567 41.44586 5
1599 26.8671 -64.39154 28.31538 5
1600 25.92786 -72.71478 25.0433 3
1601 25.80948 -60.36185 33.8543 5
1602 30.37792 -63.22886 27.79587 5
1603 32.97266 -68.92513 23.79962 3
1604 14.75046 -87.09404 36.57249 3
1605 22.59907 -86.67281 27.05869 3
1606 18.29781 -87.15288 31.94343 3
1607 12.86459 -86.93571 30.77489 3
1608 12.76327 -86.57598 23.84366 3
1609 27.58664 -74.42873 19.76901 3
1610 25.48494 -80.94803 23.23004 3
1611 34.67023 -74.3069 22.91298 8
1612 31.71364 -72.13829 18.5595 3
1613 28.18546 -76.71564 15.02589 3
1614 30.8016 -79.85664 13.4897 3
1615 24.71976 -82.93453 14.4149 3
1616 16.92196 -87.98379 18.84384 3
1617 14.52231 -91.36934 18.04741 3
1618 20.07809 -85.03249 21.88034 3
1619 21.11077 -86.63477 17.59226 3
1620 25.11872 -88.87422 17.34963 3
1621 18.20349 -94.65508 14.63494 3
1622 27.85549 -90.85682 15.1393 3
1623 23.85867 -94.63838 17.46035 3
1624 21.07032 -97.63104 12.8485 3
1625 24.37122 -97.9494 7.16901 3
1626 31.04843 -49.01585 39.19971 5
1627 32.54866 -52.47567 37.97857 5
1628 39.69588 -52.24858 40.2802 5
1629 42.57351 -55.77425 41.65557 8
1630 38.0108 -54.17148 38.64544 5
1631 35.34567 -56.4838 39.22759 5
1632 36.52213 -60.32372 42.55376 5
1633 47.63592 -54.64996 44.66113 8
1634 48.15855 -58.09575 43.89802 8
1635 46.13295 -57.14761 44.62084 8
1636 49.95104 -54.56362 40.04323 8
1637 46.7444 -57.36857 36.16397 8
1638 47.76889 -58.03759 40.05602 8
1639 46.94444 -61.04221 39.92606 8
1640 44.04537 -62.40209 36.29597 8
1641 42.37763 -62.96166 40.90591 8
1642 39.45921 -61.55033 44.293 8
1643 35.8929 -64.20473 46.52388 8
1644 43.13162 -59.10978 44.23183 8
1645 41.88745 -63.07373 45.09408 8
1646 40.63869 -67.51061 43.65115 8
1647 36.39572 -67.97392 44.08155 8
1648 39.36768 -71.49475 39.51773 8
1649 37.54308 -71.29716 43.49593 8
1650 34.61329 -72.71812 39.23421 8
1651 34.54305 -75.4874 34.2765 8
1652 49.36573 -53.45181 30.84924 8
1653 45.13984 -55.65336 28.39038 8
1654 46.1056 -56.4251 32.04065 8
1655 45.52578 -51.03248 24.20308 8
1656 43.5726 -53.33674 20.88253 8
1657 43.87749 -54.44093 24.53494 8
1658 46.41904 -57.97453 23.86705 8
1659 50.1083 -59.48081 19.70509 8
1660 50.71569 -60.88325 23.24408 8
1661 43.84525 -48.71554 16.8043 8
1662 46.79686 -51.44093 12.4505 8
1663 44.40804 -52.65232 16.48311 8
1664 45.87642 -46.23992 10.07747 8
1665 50.33031 -47.2492 6.19696 8
1666 49.08689 -49.82312 9.1784 8
1667 52.27696 -53.19151 9.84378 8
1668 56.44275 -54.93189 8.13417 8
1669 53.49274 -56.61568 10.38302 8
1670 49.56388 -58.03605 16.49864 8
1671 44.75675 -58.66305 16.91076 8
1672 47.17934 -55.45579 16.85185 8
1673 50.59154 -57.23901 13.04806 8
1674 49.1386 -56.70491 8.28512 8
1675 40.88703 -58.33059 12.50974 8
1676 40.10508 -59.63923 18.1326 8
1677 49.84956 -59.59498 5.43889 8
1678 44.67651 -58.1045 7.87036 8
1679 41.12636 -60.97482 8.62352 8
1680 43.1188 -63.7647 6.20096 8
1681 40.81643 -65.8278 8.95069 8
1682 36.37753 -79.30999 31.95209 8
1683 35.73172 -78.10712 27.44123 8
1684 42.31542 -71.50446 34.37405 8
1685 38.10409 -75.06219 34.4444 8
1686 39.35947 -77.89455 28.06641 8
1687 41.88617 -75.14153 24.45971 8
1688 41.27581 -79.30974 22.35979 8
1689 46.80479 -62.91725 31.27782 8
1690 43.23935 -65.94115 32.2732 8
1691 47.746 -60.23714 31.47911 8
1692 49.99066 -62.7707 27.13773 8
1693 47.35064 -63.7562 24.05392 8
1694 39.53954 -70.22528 26.16813 8
1695 41.6072 -72.74074 20.45223 8
1696 43.50938 -69.25418 29.64099 8
1697 42.9761 -66.47551 25.52471 8
1698 41.40863 -62.87956 22.14647 8
1699 40.70451 -70.63731 16.44241 8
1700 44.45817 -75.06861 14.69041 8
1701 37.81523 -64.80797 18.10494 8
1702 40.44708 -67.89931 13.09031 8
1703 44.62546 -70.77483 9.87042 8
1704 36.53427 -80.08315 22.64598 8
1705 39.9388 -80.96773 17.21666 8
1706 38.36681 -83.14494 20.37538 8
1707 35.15577 -81.54076 17.19492 3
1708 32.49533 -84.17268 13.06278 3
1709 42.87091 -74.70557 10.55937 8
1710 40.38996 -77.03036 14.19994 8
1711 47.31163 -73.29262 5.50725 8
1712 48.25241 -74.85972 9.98326 8
1713 42.98268 -78.08379 6.64107 8
1714 41.57763 -80.96368 3.4679 8
1715 36.34126 -78.89833 3.65859 8
1716 33.49938 -85.49928 10.91254 3
1717 30.74877 -89.2023 13.02485 3
1718 36.21615 -80.86943 12.62249 8
1719 32.72685 -80.868 7.85299 3
1720 29.7969 -82.46252 3.58887 3
1721 27.3146 -91.75271 10.11145 3
1722 30.00194 -86.51092 -0.20181 3
1723 27.01973 -88.49671 5.21154 3
1724 27.14181 -93.92133 5.3413 3
1725 23.47314 -96.21074 1.57989 3
1726 32.6487 -46.74858 38.80846 5
1727 34.67643 -41.41848 35.686 5
1728 33.36882 -44.25127 36.66704 5
1729 36.46694 -48.48205 37.639 5
1730 40.727 -49.77911 39.19966 5
1731 40.01744 -36.49585 38.05607 5
1732 37.20232 -38.74358 36.20992 5
1733 44.36444 -32.28291 40.10566 5
1734 41.76234 -34.23159 40.10302 5
1735 43.06448 -38.19053 38.8175 5
1736 46.47089 -39.16068 39.80652 8
1737 44.80599 -41.15627 36.28083 8
1738 41.34822 -47.38967 37.10546 8
1739 45.00423 -51.03408 41.71781 8
1740 38.80134 -42.68419 34.74093 5
1741 42.74782 -44.4709 35.3153 8
1742 46.31741 -45.81107 36.17243 8
1743 48.51477 -51.55275 43.07812 8
1744 49.3499 -46.59332 36.85707 8
1745 48.99005 -49.17365 39.68532 8
1746 51.57261 -52.00763 42.41029 8
1747 53.26032 -52.12555 39.09842 8
1748 48.8126 -28.39349 38.09828 2
1749 47.11623 -30.4954 39.26839 2
1750 51.2949 -23.57054 34.92054 2
1751 50.15566 -25.82641 36.96383 2
1752 52.62451 -29.36598 40.96346 2
1753 56.47697 -28.45967 42.86317 2
1754 54.18084 -31.66593 45.02892 2
1755 54.65438 -18.55755 31.55523 2
1756 53.26442 -21.24199 32.91338 2
1757 59.95959 -13.79801 27.47417 2
1758 57.3077 -15.61365 30.06691 2
1759 56.34072 -21.29819 29.32362 2
1760 58.10348 -23.29825 27.25797 2
1761 59.3108 -24.47327 29.77187 2
1762 58.25422 -25.94854 38.91779 2
1763 59.54716 -28.56346 41.41996 2
1764 55.44724 -24.9129 35.03458 2
1765 59.22289 -25.40171 34.09323 2
1766 59.89716 -27.12984 31.76427 2
1767 58.43433 -30.74559 38.44789 2
1768 58.76498 -33.07445 40.72802 2
1769 55.50105 -28.64713 30.33014 2
1770 57.26698 -29.27927 34.5313 2
1771 55.15659 -33.8203 35.75163 2
1772 52.66412 -36.52741 32.5245 10
1773 57.59917 -37.34474 32.65004 10
1774 54.63497 -50.75586 36.40309 8
1775 53.60807 -52.64815 32.86079 8
1776 50.71789 -44.01094 38.91135 8
1777 52.33395 -47.43871 37.41041 8
1778 54.10442 -47.99038 35.11031 8
1779 52.05324 -44.34709 34.0391 8
1780 54.47635 -48.22838 30.69039 8
1781 48.77477 -37.44378 44.08933 8
1782 49.96581 -40.72662 41.37809 8
1783 47.63004 -33.76319 43.72327 2
1784 51.16217 -35.18621 47.06348 2
1785 54.72621 -36.08664 46.90663 2
1786 54.07574 -42.40289 38.69471 8
1787 54.53265 -41.35839 32.80648 8
1788 53.03761 -43.04498 42.7004 8
1789 54.59565 -39.80395 43.27926 8
1790 56.31292 -36.12329 42.27031 2
1791 59.36126 -40.40535 32.30907 8
1792 57.15834 -42.01432 26.50257 8
1793 59.44756 -37.40039 36.97288 2
1794 61.91233 -38.22743 32.61788 10
1795 61.91274 -37.92842 27.5624 10
1796 52.59756 -51.89824 28.79273 8
1797 53.76478 -47.49552 27.23326 8
1798 53.94642 -50.1003 27.84997 8
1799 50.67933 -50.27044 25.65916 8
1800 49.00329 -48.32169 22.83756 8
1801 59.70318 -42.55078 22.77309 8
1802 56.18666 -44.20661 25.30273 8
1803 60.589 -37.5963 22.91351 10
1804 62.31419 -39.21366 22.75129 10
1805 60.7864 -41.19013 19.04023 10
1806 62.08045 -40.07215 15.76825 10
1807 58.62732 -42.58935 16.78927 8
1808 51.95637 -46.3253 21.07296 8
1809 47.56634 -46.53767 19.26115 8
1810 53.31102 -45.55657 23.57895 8
1811 54.75262 -44.46267 19.10885 8
1812 55.15231 -42.43356 16.03889 8
1813 46.25244 -45.25588 16.23287 8
1814 55.228 -39.59291 12.76936 8
1815 50.10491 -42.46068 15.06958 8
1816 45.73057 -43.33323 13.51598 8
1817 45.53006 -40.84378 10.46317 8
1818 63.24767 -10.76174 23.97188 2
1819 61.35828 -15.76912 23.93083 2
1820 62.56781 -12.81135 18.24789 2
1821 59.33514 -17.72741 18.57579 2
1822 61.89285 -17.28522 20.54021 2
1823 59.01367 -19.60671 23.53477 2
1824 56.36945 -23.51899 24.81457 2
1825 54.98469 -12.56728 17.66092 2
1826 51.1786 -17.55922 19.72082 2
1827 55.37705 -17.41235 18.81578 2
1828 47.86504 -12.90284 18.99601 2
1829 43.8933 -17.71815 20.36837 2
1830 47.32058 -17.86462 19.23623 2
1831 46.79609 -21.76293 18.74994 2
1832 43.18257 -25.59832 21.34979 2
1833 46.92745 -25.168 20.24717 2
1834 53.89444 -23.49191 22.58353 2
1835 53.96112 -26.40376 27.27661 2
1836 54.95124 -21.05964 18.42501 2
1837 50.44834 -24.17459 20.65601 2
1838 46.92251 -27.46853 22.8446 2
1839 51.2523 -29.36092 28.36839 2
1840 44.26482 -31.31971 25.55098 10
1841 47.45448 -29.67625 26.94159 2
1842 49.17008 -33.36216 30.54066 2
1843 50.74188 -37.74123 28.55001 10
1844 40.72161 -12.41155 20.8588 2
1845 36.31318 -18.14998 21.26638 10
1846 39.71978 -17.79308 21.91445 2
1847 35.04944 -12.76844 18.51626 10
1848 34.342 -19.38161 14.82099 10
1849 34.45147 -18.53957 18.63684 10
1850 32.61922 -24.01334 18.16881 10
1851 33.10781 -28.07586 13.62511 10
1852 32.72746 -29.13885 17.42651 10
1853 35.66393 -14.0742 11.89473 11
1854 34.38346 -18.34871 7.26946 10
1855 34.49319 -19.38413 10.83549 10
1856 38.19588 -13.22782 5.19296 11
1857 35.91282 -18.63913 -1.04616 11
1858 35.07333 -18.45492 3.07612 11
1859 36.34953 -24.03617 1.08683 10
1860 43.66653 -22.55203 -1.38304 10
1861 40.975 -25.0718 1.5719 10
1862 35.32371 -27.30438 9.32732 10
1863 40.03756 -25.87943 10.61487 10
1864 32.67678 -24.34303 9.22314 10
1865 38.23621 -26.45222 5.31585 10
1866 44.50062 -20.71155 4.47892 10
1867 47.43408 -22.58687 7.08529 10
1868 44.53799 -26.34161 7.84132 10
1869 51.07014 -14.09919 4.15449 10
1870 49.43066 -18.64509 6.22756 10
1871 53.7906 -18.53066 2.73632 10
1872 61.95134 -14.63094 2.43212 10
1873 58.979 -19.07783 3.77014 10
1874 50.58755 -37.72749 23.5689 10
1875 56.61896 -37.88148 22.73377 10
1876 42.12978 -34.91457 23.17219 10
1877 45.66557 -36.93076 23.30603 10
1878 51.02144 -36.71418 18.21492 10
1879 52.30368 -34.26093 13.56791 10
1880 58.54625 -33.70092 14.12004 10
1881 38.4997 -27.27574 21.99747 10
1882 39.42835 -31.76778 22.16865 10
1883 38.53696 -22.89419 20.39623 10
1884 34.46945 -29.2515 20.9202 10
1885 36.43293 -32.69233 15.15641 10
1886 46.30507 -34.70457 12.88913 10
1887 54.01222 -31.02799 9.54681 10
1888 40.82808 -36.4049 17.92404 10
1889 40.89668 -34.5789 12.94742 10
1890 42.18527 -30.68282 9.00098 10
1891 55.17741 -27.09304 7.58455 10
1892 61.47565 -27.63564 6.22631 10
1893 49.29403 -27.00556 6.39559 10
1894 57.07266 -22.9314 6.30006 10
1895 64.31377 -19.79473 4.93656 10
1896 61.10781 -36.24957 18.42325 10
1897 63.99909 -32.04039 11.48779 10
1898 62.6371 -34.14793 15.13942 10
1899 64.17722 -36.84251 15.40718 10
1900 62.36906 -37.58163 12.58825 10
1901 66.26839 -26.10703 3.85162 10
1902 65.12714 -29.59434 7.33495 10
1903 64.355 -19.43022 0.67309 10
1904 65.95161 -22.43417 2.26234 10
1905 64.25667 -26.60262 1.13054 10
1906 57.6648 -27.24688 0.74026 10
1907 60.41183 -30.50259 1.43234 10
1908 62.54541 -35.65876 8.46919 10
1909 58.87627 -37.63287 10.21737 10
1910 65.74905 -32.8047 7.72862 10
1911 62.37104 -32.70399 4.83894 10
1912 55.9734 -32.94366 3.7117 10
1913 53.67059 -37.64824 8.66591 8
1914 49.17688 -34.21165 3.10263 8
1915 51.85377 -35.46664 6.09534 8
1916 48.14346 -38.1293 8.26208 8
1917 44.88262 -40.38068 6.33765 8
1918 63.41259 -8.43278 19.8534 2
1919 59.79024 -0.4109 16.95923 2
1920 60.14602 -7.44496 14.50122 2
1921 64.22265 -9.22831 15.65906 2
1922 62.5461 -10.07734 12.66623 2
1923 54.73339 4.58748 21.46276 2
1924 59.53797 5.40965 19.18115 2
1925 43.1103 5.05698 21.00795 1
1926 48.90201 3.53699 21.40252 2
1927 53.70687 4.11666 17.16876 2
1928 53.11438 4.4599 13.16638 2
1929 57.48048 4.95133 11.89869 2
1930 60.29762 -5.77173 10.44241 2
1931 58.74141 -10.59784 12.42605 2
1932 59.987 0.38193 14.10655 2
1933 57.53371 0.12127 13.02639 2
1934 55.83224 0.35697 10.2773 2
1935 54.8326 -10.45386 12.90309 2
1936 54.82145 -0.31674 7.1037 2
1937 53.37409 -5.70111 10.8267 2
1938 51.47827 -9.8839 13.66864 2
1939 48.05101 -9.59073 14.28578 2
1940 37.54082 16.00579 21.83021 1
1941 39.05628 10.52684 21.95082 1
1942 41.4507 25.16875 24.54785 1
1943 37.92919 21.65088 22.45057 1
1944 41.25909 19.29873 19.73515 1
1945 46.35058 22.2174 18.72383 1
1946 45.86938 17.01932 19.67873 1
1947 46.23168 32.03074 22.49561 1
1948 45.19458 28.42231 24.33169 1
1949 40.01439 40.37419 21.14298 1
1950 42.22072 35.73131 22.33837 1
1951 39.39106 33.59649 18.79847 1
1952 35.33609 34.9959 13.00893 1
1953 38.55073 30.95905 13.94926 1
1954 45.46179 25.5887 18.70126 1
1955 50.35573 24.93813 18.44031 1
1956 42.45006 27.293 21.17113 1
1957 41.70974 27.77629 15.50039 1
1958 43.82833 30.86383 11.23041 1
1959 51.84054 26.12095 13.29299 11
1960 54.21576 22.55661 17.35988 11
1961 46.11792 32.66763 7.10251 1
1962 48.97205 29.232 9.23756 11
1963 53.42327 27.24385 8.05507 11
1964 52.79196 27.44558 3.93569 11
1965 52.48559 24.63461 7.70817 11
1966 48.37574 -4.76042 9.98876 2
1967 44.11077 -9.08185 15.30998 2
1968 55.62154 3.80529 3.83161 2
1969 52.48957 0.33827 5.2696 2
1970 49.91094 2.17183 6.81091 2
1971 49.01869 7.15468 2.596 2
1972 46.22754 2.62284 10.12868 11
1973 47.69424 6.44514 14.17838 2
1974 52.20406 4.87345 8.26845 2
1975 43.92471 8.70049 19.07041 1
1976 46.66961 11.70702 19.18661 1
1977 50.12269 14.47375 19.19364 2
1978 52.04465 10.525 3.22133 2
1979 50.11528 12.32144 3.16529 11
1980 51.85804 7.54758 5.08532 2
1981 51.61807 12.29945 11.16668 2
1982 54.33195 16.70553 17.25478 11
1983 49.94711 14.54468 9.14177 11
1984 44.87738 12.7606 5.18576 11
1985 54.28968 18.86286 15.11925 11
1986 50.70107 21.02267 11.01455 11
1987 47.36754 22.4325 8.27931 11
1988 41.51186 -7.89541 16.40271 2
1989 42.7668 3.31057 11.94108 11
1990 43.86513 -1.78061 15.90249 11
1991 38.98098 -7.27371 17.44907 11
1992 36.30417 -7.09507 16.93946 11
1993 41.82391 14.52235 8.23524 11
1994 42.13866 9.37144 8.78363 11
1995 43.81545 24.7575 7.12191 11
1996 42.95618 19.97313 9.40156 11
1997 38.84814 16.84618 10.55608 11
1998 35.71436 19.39308 11.95411 11
1999 36.09964 12.82104 12.60342 11
2000 37.11046 -0.321 16.61782 11
2001 34.62658 -7.31216 14.52646 11
2002 39.48743 4.5157 12.9739 11
2003 36.58795 5.83956 13.58981 11
2004 33.89515 6.61908 12.90777 11
2005 34.73005 -7.31549 11.29173 11
2006 32.67062 7.3086 10.552 11
2007 34.14945 -0.0228 11.67141 11
2008 35.45024 -7.10043 8.1407 11
2009 36.27338 -7.28534 4.79297 11
2010 38.71931 44.18702 17.10351 1
2011 39.15127 50.24373 9.13876 1
2012 38.75633 47.55886 13.24834 1
2013 37.7107 41.32106 12.96507 1
2014 36.67568 38.23344 8.26926 1
2015 36.29337 52.80251 0.64003 1
2016 38.85355 51.71475 4.65758 1
2017 33.92193 55.89524 -8.5618 7
2018 35.01978 52.17827 -5.19971 1
2019 39.41718 50.94758 -2.24438 1
2020 40.88597 46.62312 -5.71844 11
2021 38.87474 44.94051 -1.75114 11
2022 38.5674 40.85629 4.87769 1
2023 41.29879 36.02414 5.5894 1
2024 39.89381 46.79663 5.54532 1
2025 40.05396 43.26472 1.93873 1
2026 42.22303 39.5436 -1.43896 11
2027 47.34602 35.0873 4.47236 11
2028 47.58403 37.57366 -3.50003 11
2029 47.52034 35.43339 0.31898 11
2030 51.8409 31.49146 1.82155 11
2031 50.79818 28.74399 0.9517 11
2032 25.03003 48.73432 -11.35199 7
2033 29.69658 53.50488 -11.07031 7
2034 19.0951 40.65809 -16.20698 7
2035 20.71899 44.60876 -11.94332 7
2036 26.08329 42.15025 -10.58011 7
2037 27.1572 36.80462 -9.16646 11
2038 30.94649 40.33033 -10.47184 11
2039 14.88373 31.79827 -25.4127 7
2040 17.13881 35.86448 -21.06603 7
2041 14.65142 23.52994 -21.30435 7
2042 13.5341 27.07029 -24.97549 7
2043 16.65616 25.27625 -23.60663 7
2044 18.07841 19.12222 -21.07573 7
2045 19.8553 24.02671 -16.62048 7
2046 23.75964 33.12281 -10.27464 7
2047 29.94602 31.32619 -9.8134 11
2048 22.80328 35.07317 -16.74031 7
2049 21.04562 28.97056 -12.85619 7
2050 24.84735 24.89908 -15.97359 7
2051 33.41055 28.39563 -17.20794 11
2052 35.76925 31.09264 -13.75517 11
2053 27.83733 21.26217 -21.15027 11
2054 30.26665 25.05411 -19.74379 11
2055 33.47001 23.94682 -18.22133 11
2056 27.74089 22.2552 -13.63368 11
2057 32.58408 24.51365 -13.41339 11
2058 47.43238 30.41401 -1.02299 11
2059 44.62805 27.6128 3.5849 11
2060 46.24763 35.90148 -7.76104 11
2061 50.37429 32.76801 -5.46654 11
2062 45.03195 32.4693 -3.92647 11
2063 43.89489 31.48304 -7.28081 11
2064 38.31739 32.00838 -0.21084 11
2065 41.77337 47.97178 -9.63999 11
2066 44.01824 42.90026 -10.03858 11
2067 35.65661 52.02558 -9.13756 11
2068 35.89158 45.38392 -10.08544 11
2069 37.14016 38.65473 -8.50745 11
2070 47.01609 32.31276 -12.49984 11
2071 42.55602 29.53515 -9.04969 11
2072 46.36732 37.946 -12.94671 11
2073 43.04163 35.66194 -12.96082 11
2074 39.95487 31.61905 -11.69005 11
2075 40.01116 26.5599 -9.85687 11
2076 33.55375 29.39135 -4.11685 11
2077 41.33595 26.21749 -14.38897 11
2078 36.84271 25.19409 -11.67967 11
2079 28.84708 24.2285 -7.59758 11
2080 39.41836 26.63972 6.66064 11
2081 32.36897 30.17225 3.86048 11
2082 35.67558 29.18476 5.39313 11
2083 34.84241 24.54205 9.81293 11
2084 31.66997 19.90095 11.19904 11
2085 29.15518 25.23115 -1.55402 11
2086 29.8387 28.4473 1.0284 11
2087 30.10731 17.65824 -5.68989 11
2088 29.40985 21.30278 -3.37105 11
2089 33.97055 19.10487 -2.08028 11
2090 36.40372 12.97588 -3.58437 11
2091 34.69014 15.05612 -0.45096 11
2092 30.59976 18.58048 7.74133 11
2093 31.24624 12.75093 9.44536 11
2094 29.63116 23.99917 5.08781 11
2095 32.08175 16.37609 3.56851 11
2096 34.24788 8.59396 1.10017 11
2097 33.60514 5.5262 6.73941 11
2098 38.32587 0.93575 -0.81523 11
2099 35.81885 2.40794 2.6247 11
2100 37.629 -2.07715 4.5663 11
2101 37.55227 -8.92715 0.39615 11
2102 13.36578 13.42844 -14.09993 7
2103 15.27551 19.60159 -14.33847 7
2104 14.13058 -1.17201 -12.86489 -1
2105 13.65464 5.68068 -14.69815 7
2106 16.72631 4.88669 -14.85747 7
2107 20.8781 -1.94126 -12.22973 -1
2108 20.00425 3.88007 -14.18876 7
2109 14.33133 -12.71043 -15.92269 -1
2110 13.84402 -7.34221 -13.87658 -1
2111 17.16562 -24.09013 -15.88899 -1
2112 16.13133 -19.02052 -18.65403 -1
2113 19.8549 -17.2882 -13.73784 -1
2114 28.36178 -19.92865 -10.98855 -1
2115 25.8284 -16.2473 -11.32304 -1
2116 22.03695 -7.15767 -10.94417 -1
2117 26.46774 -6.8067 -12.51008 -1
2118 18.13726 -7.15311 -12.45846 -1
2119 24.04802 -12.00813 -11.09198 -1
2120 31.97203 -15.53157 -13.48858 -1
2121 33.75333 -10.52339 -17.74317 -1
2122 29.79296 -6.9333 -16.32448 -1
2123 38.74969 -17.24325 -17.02405 -1
2124 36.72938 -13.86354 -18.01169 -1
2125 38.10447 -10.8313 -23.03579 -1
2126 34.74219 -12.20257 -26.34118 -1
2127 34.98579 -8.39095 -27.20328 -1
2128 21.97974 -28.81356 -6.7815 -1
2129 19.17485 -25.23895 -9.54977 -1
2130 26.10014 -35.0112 0.15522 -1
2131 24.55434 -33.25378 -4.44331 -1
2132 30.27881 -32.75876 -4.0792 -1
2133 35.13551 -36.746 -2.37206 -1
2134 35.27845 -32.71755 -4.71343 -1
2135 23.71959 -38.61744 4.7334 -1
2136 26.3912 -36.25068 4.90463 -1
2137 13.75724 -41.47578 -0.52545 3
2138 19.27618 -40.4181 2.20387 -1
2139 21.34773 -41.06654 -0.49517 -1
2140 16.01973 -38.74557 -5.07785 3
2141 21.941 -39.79423 -3.70943 3
2142 32.19115 -39.62437 -1.32575 -1
2143 33.08464 -38.8436 -6.712 -1
2144 29.82112 -38.27343 3.13536 -1
2145 27.45434 -41.3517 -2.68989 -1
2146 20.35546 -36.13893 -6.70561 12
2147 24.86764 -34.63142 -10.07887 12
2148 30.97427 -35.55889 -10.72208 -1
2149 18.59469 -39.71558 -9.84985 12
2150 18.82877 -34.01742 -9.85272 12
2151 19.90576 -35.03233 -13.12768 12
2152 25.70143 -42.07317 -9.09342 12
2153 24.41653 -36.06205 -13.79369 12
2154 32.68531 -15.84608 -25.51435 -1
2155 26.65854 -11.2751 -29.14294 9
2156 40.30997 -21.46202 -16.2579 -1
2157 38.19867 -18.98163 -20.69508 -1
2158 30.76252 -19.37117 -24.13017 -1
2159 28.6107 -22.02033 -21.91171 9
2160 22.91695 -17.10507 -24.91123 9
2161 31.41356 -24.1459 -9.75252 -1
2162 37.14041 -23.32944 -11.5482 -1
2163 25.20309 -24.9274 -10.01912 -1
2164 33.5479 -28.27284 -7.42325 -1
2165 38.8803 -33.29447 -8.82172 -1
2166 34.33467 -26.64038 -17.52643 -1
2167 25.74049 -23.95688 -19.14985 9
2168 40.21507 -26.60327 -14.97495 -1
2169 38.644 -31.34527 -13.72667 -1
2170 35.31512 -34.24708 -12.12152 -1
2171 22.71104 -26.44135 -17.31885 12
2172 23.45469 -25.87457 -22.56954 9
2173 26.73322 -30.46127 -14.19015 12
2174 21.75239 -31.06832 -17.18494 12
2175 30.36156 -35.44923 -14.403 12
2176 22.2685 -9.46865 -30.0793 9
2177 24.3749 -6.22917 -31.62481 9
2178 23.41551 -18.70938 -28.06514 9
2179 21.52078 -13.45029 -28.85118 9
2180 24.97898 -11.05882 -32.78608 9
2181 31.98579 -12.19408 -31.82767 9
2182 31.36484 -6.82297 -33.47292 9
2183 29.89666 -27.75106 -20.94054 9
2184 26.74955 -24.06166 -25.8688 9
2185 35.42794 -40.14693 -11.18313 12
2186 34.18285 -33.25984 -15.86846 12
2187 36.67729 -29.88912 -18.37547 9
2188 37.16563 -34.92047 -19.16352 12
2189 37.69688 -26.83821 -21.65475 9
2190 33.42706 -17.44295 -29.92245 9
2191 36.14997 -15.03259 -32.59422 9
2192 30.05095 -20.89432 -28.28087 9
2193 35.08004 -20.91656 -25.0939 9
2194 37.98236 -24.83735 -25.71151 9
2195 38.57408 -14.94015 -27.78654 9
2196 36.85825 -8.6921 -32.0237 9
2197 37.54306 -29.99177 -25.5279 9
2198 39.70552 -22.0624 -25.09618 9
2199 40.96376 -17.70883 -23.52066 9
2200 42.65789 -23.54251 -21.09211 9
2201 43.75783 -14.45917 -26.04949 9
2202 19.08444 -46.25051 -1.57203 3
2203 21.19332 -57.22884 -0.31934 3
2204 23.48909 -51.41232 -2.06202 3
2205 20.39586 -44.82112 -4.06504 3
2206 20.15513 -45.23675 -6.48262 3
2207 8.72249 -64.64237 5.95397 3
2208 15.41268 -62.08549 2.05403 3
2209 4.93019 -75.58189 6.09725 3
2210 5.53857 -69.53026 8.33023 3
2211 4.87557 -64.8698 5.77821 3
2212 7.27308 -69.1869 1.19717 3
2213 8.71327 -63.70667 0.92385 3
2214 14.74436 -51.52808 -2.75182 3
2215 16.79535 -45.69374 -6.67175 3
2216 13.95355 -58.05424 0.59329 3
2217 10.1329 -56.62084 -0.6773 3
2218 13.66138 -58.48254 -3.08081 3
2219 17.71878 -46.84554 -8.65426 12
2220 18.03002 -60.83194 -6.29042 12
2221 18.29571 -54.01456 -6.92895 12
2222 22.75949 -49.07103 -7.85305 12
2223 27.58134 -47.71698 -6.569 12
2224 9.33612 -86.57896 -2.04002 3
2225 7.09617 -81.86986 1.24059 3
2226 14.08134 -91.50362 -2.23186 3
2227 10.29795 -90.36098 0.11672 3
2228 5.59192 -91.0659 -5.943 3
2229 6.83583 -91.77589 -11.38428 3
2230 5.99775 -88.54517 -9.30931 3
2231 15.67616 -100.36958 -2.93233 3
2232 17.86901 -95.42117 -1.82976 3
2233 21.82745 -99.76247 -1.87046 3
2234 17.63973 -101.48387 -3.23271 3
2235 18.07363 -100.8845 -9.73802 3
2236 24.35185 -98.89673 -12.70196 3
2237 19.09054 -98.93707 -13.97816 3
2238 10.65913 -94.16466 -8.93498 3
2239 13.416 -88.87183 -10.72304 3
2240 13.88123 -94.80235 -6.98969 3
2241 14.943 -95.89949 -11.76512 3
2242 20.38265 -95.34147 -10.80932 3
2243 19.7184 -86.82275 -8.41886 3
2244 19.10007 -85.48191 -12.73526 12
2245 26.90283 -90.33574 -11.31463 3
2246 23.13665 -89.95337 -6.79881 3
2247 25.59613 -84.74445 -10.23409 12
2248 32.66796 -80.35368 -10.98262 12
2249 30.6053 -79.07555 -8.43719 12
2250 29.02995 -53.4358 -5.64988 12
2251 33.87602 -46.69102 -7.6235 12
2252 17.02815 -64.60144 -7.74379 12
2253 23.36219 -60.32248 -6.50287 12
2254 28.66121 -59.78764 -4.82212 12
2255 27.58366 -66.02168 -4.04503 12
2256 31.99753 -59.12365 -8.2011 12
2257 7.86485 -75.26546 1.42121 3
2258 10.8732 -72.44359 -4.00233 12
2259 3.38475 -77.74544 0.5192 3
2260 6.7803 -81.33474 -4.74899 3
2261 11.86551 -83.29778 -9.04965 3
2262 20.11543 -73.0486 -4.76101 12
2263 26.11662 -71.38707 -4.81827 12
2264 15.86605 -71.48003 -7.12798 12
2265 15.50517 -77.39384 -9.22246 12
2266 16.7647 -81.0728 -12.64779 12
2267 26.56408 -74.76211 -6.59419 12
2268 28.67047 -67.89622 -9.74136 12
2269 21.3 -80.16745 -8.03442 12
2270 28.79273 -77.17754 -8.00581 12
2271 31.53053 -73.07202 -13.13038 12
2272 36.15034 -45.46438 -11.19163 12
2273 29.83859 -55.16044 -12.31275 12
2274 33.02472 -50.28369 -12.05737 12
2275 34.74768 -42.44436 -15.70746 12
2276 32.10692 -38.35149 -19.48892 12
2277 29.47338 -64.18102 -14.11144 12
2278 28.15574 -60.54493 -12.90951 12
2279 35.6889 -68.27917 -14.18626 12
2280 32.53872 -66.33913 -14.91922 12
2281 35.73314 -57.75593 -16.06674 12
2282 40.7476 -54.41484 -19.12683 12
2283 37.59444 -50.38932 -18.69839 12
2284 29.6152 -42.75195 -19.39319 12
2285 32.64782 -35.8464 -23.66417 9
2286 28.41973 -51.61165 -15.84616 12
2287 33.02625 -46.91154 -18.14183 12
2288 38.79972 -44.22642 -21.29875 9
2289 37.86802 -34.66862 -23.39828 9
2290 41.82735 -40.79227 -20.65214 9
2291 40.38342 -38.11247 -22.13072 9
2292 41.78205 -31.90569 -20.78274 9
2293 45.83264 -28.26084 -21.27811 9
2294 25.91569 -97.06945 -1.45744 3
2295 33.99283 -88.16197 -2.49916 3
2296 28.75852 -92.38145 -2.34562 3
2297 28.10487 -96.83652 -6.94495 3
2298 29.07594 -95.01933 -10.93267 3
2299 44.39327 -81.9445 1.44027 8
2300 39.74453 -85.07657 -0.85789 3
2301 43.88718 -71.58463 2.47471 8
2302 46.28712 -76.22602 2.09176 8
2303 44.71105 -79.30092 -1.56322 8
2304 42.06496 -76.51278 -4.15973 8
2305 44.12377 -80.30827 -6.98359 8
2306 34.62751 -89.17316 -10.54186 3
2307 31.73738 -91.17655 -13.65458 3
2308 36.98315 -87.27496 -5.2507 3
2309 40.9851 -85.05777 -9.16022 12
2310 43.51517 -81.58953 -12.10266 12
2311 33.40214 -86.56651 -13.58421 12
2312 43.11678 -76.81941 -12.60054 12
2313 39.94566 -81.52435 -13.39037 12
2314 34.96838 -81.37795 -12.94993 12
2315 36.48964 -76.07922 -14.43407 12
2316 47.57568 -62.09132 3.65174 8
2317 43.38731 -64.66424 3.52932 8
2318 55.93577 -60.12463 4.0486 8
2319 51.86229 -62.12208 3.71991 8
2320 51.6334 -58.48296 0.93175 8
2321 54.96987 -54.39923 -2.86319 8
2322 51.49823 -57.38353 -2.09171 8
2323 57.86367 -50.7162 5.20416 8
2324 58.52754 -55.17898 4.7712 8
2325 48.38352 -43.83382 4.06185 8
2326 53.76091 -46.88235 3.71428 8
2327 57.40128 -45.90742 1.80405 8
2328 55.04594 -43.02293 -2.89902 8
2329 60.84202 -44.88137 -0.69285 8
2330 59.20132 -51.39185 -2.25799 8
2331 57.35862 -49.25172 -5.27395 8
2332 60.25114 -54.68698 1.67246 8
2333 63.24857 -47.79096 -0.43664 8
2334 64.16243 -42.61632 -3.50613 8
2335 60.1935 -43.53955 -7.70472 8
2336 54.55244 -47.90916 -8.1336 8
2337 62.08006 -37.75486 -6.23165 8
2338 64.84304 -40.44469 -6.90359 8
2339 62.70663 -38.28853 -10.11434 8
2340 64.92049 -33.61348 -12.42561 8
2341 61.01499 -38.94342 -13.82895 8
2342 43.10429 -69.34845 -15.94541 12
2343 39.18119 -68.89598 -14.17553 12
2344 44.83995 -70.40144 -10.09101 8
2345 45.58284 -69.0687 -14.14365 12
2346 43.66333 -63.09035 -12.30322 12
2347 47.17229 -57.90569 -10.37424 8
2348 43.19842 -57.42126 -10.1829 8
2349 40.70635 -68.46013 -2.4723 8
2350 42.40805 -70.02921 -6.39058 8
2351 41.62908 -66.11271 0.86243 8
2352 45.61699 -59.97534 -1.34123 8
2353 51.92106 -58.72512 -4.24897 8
2354 50.57826 -58.55659 -9.58477 8
2355 53.15674 -56.45861 -14.80174 8
2356 45.26221 -63.22852 -7.03158 8
2357 51.91248 -61.65164 -7.40331 8
2358 55.07217 -55.4748 -8.77362 8
2359 56.54553 -52.85321 -16.5603 8
2360 54.35006 -52.74583 -18.88037 8
2361 54.34798 -50.26509 -12.56798 8
2362 57.15184 -44.78114 -15.30852 8
2363 57.3287 -40.06259 -16.00381 8
2364 39.66605 -63.23071 -15.37129 12
2365 45.94141 -52.60606 -12.54085 8
2366 40.43524 -57.29192 -11.89505 12
2367 40.32911 -56.10155 -16.01872 12
2368 41.23339 -48.8957 -16.22812 12
2369 55.86079 -46.4869 -21.80232 8
2370 51.31149 -49.6949 -17.26638 8
2371 58.65281 -33.26919 -16.60687 8
2372 56.07407 -41.15528 -18.93473 8
2373 55.7714 -40.21275 -21.60916 9
2374 53.48016 -31.45433 -21.12794 9
2375 55.04836 -37.50443 -23.97554 9
2376 45.12874 -43.76299 -15.35193 9
2377 42.95502 -41.90474 -17.5695 9
2378 48.03609 -46.28575 -15.56829 8
2379 50.80191 -40.8625 -20.40968 9
2380 53.60172 -35.2631 -26.27022 9
2381 46.18349 -35.74441 -19.90544 9
2382 56.35615 -28.82847 -29.05529 9
2383 51.01635 -32.31089 -25.05716 9
2384 48.44616 -30.18586 -23.41155 9
2385 49.70201 -23.651 -27.19779 9
2386 45.47438 -41.54456 2.20064 8
2387 45.68742 -32.81992 1.17548 8
2388 44.45444 -37.33858 1.43476 8
2389 47.81676 -41.27068 -1.74758 8
2390 51.01664 -39.43062 -4.59067 8
2391 53.27496 -25.64859 -1.03539 10
2392 49.22969 -28.84661 0.57339 10
2393 61.48 -17.45765 -1.17325 10
2394 57.30342 -21.6689 -1.83478 10
2395 49.42353 -23.60254 -3.33768 10
2396 46.82761 -21.62152 -6.68201 10
2397 44.90548 -25.87932 -6.93895 10
2398 47.79111 -35.35101 -6.20997 8
2399 55.28469 -36.33083 -6.62378 8
2400 44.25138 -31.84632 -2.52128 8
2401 45.43652 -30.79815 -7.10185 8
2402 49.07985 -29.0877 -10.53564 8
2403 59.73989 -33.59314 -9.2009 8
2404 53.87862 -25.89676 -12.71477 8
2405 57.34984 -29.56337 -10.95988 8
2406 64.17442 -30.03551 -10.06085 8
2407 65.48029 -28.16359 -13.29174 8
2408 62.49193 -9.87136 0.45257 10
2409 64.1984 -12.86312 -0.86978 10
2410 51.87923 -10.84393 0.39918 10
2411 57.38388 -9.31307 0.75623 10
2412 61.79346 -5.36955 -1.82704 10
2413 60.39719 -1.87236 -5.15143 10
2414 59.38325 -6.49983 -6.65092 10
2415 44.35982 -19.74493 -4.9196 10
2416 49.05122 -16.45968 -2.37447 10
2417 36.03248 -15.88486 -4.15357 11
2418 38.96604 -19.93737 -6.05158 10
2419 44.85483 -16.4886 -8.21847 10
2420 45.38517 -12.87467 -11.47413 10
2421 49.97206 -8.7134 -9.2264 10
2422 58.00874 0.66428 -5.29373 10
2423 58.21301 1.71974 -8.87531 10
2424 53.41901 -7.33051 -3.34054 10
2425 53.4029 -2.61057 -6.44821 10
2426 52.78483 2.34356 -9.49368 10
2427 55.73531 4.6761 -12.46524 10
2428 53.74953 -0.71789 -14.08022 10
2429 51.62407 6.00375 -13.63357 10
2430 54.46844 8.30121 -11.87143 10
2431 53.38292 7.38005 -17.37633 10
2432 50.21318 10.57455 -21.83323 10
2433 49.76962 5.00909 -23.42421 10
2434 65.04844 -22.60256 -13.98255 8
2435 62.91893 -27.28566 -16.76082 8
2436 51.24341 -21.71728 -14.46382 10
2437 59.42455 -21.46739 -14.03716 8
2438 63.3104 -16.50495 -14.63289 9
2439 61.27618 -11.90649 -18.39328 9
2440 63.40143 -14.03983 -19.49265 9
2441 50.5609 -16.86357 -7.12386 10
2442 46.56281 -19.32404 -11.70504 10
2443 58.06561 -14.2848 -3.49361 10
2444 55.19823 -11.50461 -7.01071 10
2445 52.87738 -9.28032 -12.03857 10
2446 52.81659 -13.20324 -20.49613 10
2447 57.82521 -7.60804 -22.51502 9
2448 48.77699 -17.05404 -16.78716 10
2449 47.81431 -11.64858 -17.11308 10
2450 49.83265 -6.25934 -16.47094 10
2451 54.15577 -3.98776 -25.19885 10
2452 59.24099 -3.54513 -25.70731 9
2453 48.6271 -3.5374 -21.36617 10
2454 50.52325 0.33642 -26.01923 10
2455 51.94014 5.03298 -28.61346 9
2456 58.70214 -25.6767 -17.58974 9
2457 60.15421 -13.44651 -23.36823 9
2458 60.35447 -19.73906 -20.66525 9
2459 55.04029 -24.5742 -19.97276 9
2460 56.03972 -24.36631 -24.52825 9
2461 55.6215 -2.21223 -29.53442 9
2462 58.48623 -8.16567 -26.37904 9
2463 49.27956 8.16568 -32.5354 9
2464 53.50947 4.4116 -31.94685 9
2465 49.87621 -0.80366 -31.05981 9
2466 45.00291 -0.69658 -33.46064 9
2467 47.16053 -6.96067 -31.62745 9
2468 54.93868 -19.05833 -27.5323 9
2469 58.62432 -23.34802 -29.33986 9
2470 55.09213 -13.52288 -25.52127 9
2471 50.91607 -13.15565 -29.7927 9
2472 50.40605 -10.90617 -36.11296 9
2473 56.58237 -21.64392 -32.19377 9
2474 49.22452 -8.77944 -40.45185 9
2475 52.85266 -14.71628 -37.19919 9
2476 51.46572 -18.8278 -32.5953 9
2477 47.32405 -16.81425 -31.38903 9
2478 35.83704 -11.81147 -4.56885 11
2479 36.52828 -2.73427 -5.11637 11
2480 35.92192 -7.32256 -5.00703 11
2481 38.14053 -13.38959 -10.16609 11
2482 44.0453 -10.97499 -14.0712 11
2483 36.89426 7.02323 -6.48569 11
2484 37.0635 1.96683 -5.55982 11
2485 32.27662 14.244 -8.79054 11
2486 35.75761 11.49647 -7.93362 11
2487 37.57607 1.89904 -11.4084 11
2488 39.05771 -0.33973 -18.74597 11
2489 40.12189 -3.17831 -18.92151 11
2490 42.66457 -8.59224 -16.21493 11
2491 48.49088 -2.60711 -15.6164 10
2492 37.66506 -6.15501 -11.34522 11
2493 41.41559 -5.94809 -17.99472 11
2494 45.60535 0.47228 -21.60529 11
2495 49.84053 7.77219 -17.31348 10
2496 45.10799 9.30174 -24.18415 11
2497 47.51982 9.10619 -21.01493 10
2498 49.24233 14.40596 -20.38248 10
2499 46.98352 13.99309 -25.32699 9
2500 26.00853 17.75346 -14.50786 11
2501 28.27328 16.60341 -11.24579 11
2502 24.57525 16.57736 -21.62928 7
2503 26.01585 17.97624 -18.79679 11
2504 27.45251 12.52408 -15.99729 11
2505 29.23574 6.1656 -15.03757 -1
2506 31.43703 6.55669 -15.86136 -1
2507 16.36465 15.46943 -22.50896 7
2508 20.38019 15.0544 -22.13226 7
2509 15.93072 18.61595 -19.11071 7
2510 18.84148 12.89912 -16.79711 7
2511 22.11232 4.98068 -14.10678 7
2512 27.31769 6.17987 -14.00415 -1
2513 32.19766 0.44453 -14.63809 -1
2514 22.82744 11.95126 -18.23301 7
2515 24.62093 5.76988 -13.84115 7
2516 26.46174 -0.79125 -12.85306 -1
2517 32.5679 -3.0825 -19.23565 -1
2518 33.87332 -1.42143 -21.81735 9
2519 30.49811 -4.58444 -18.53214 -1
2520 33.95833 -5.65645 -24.73209 -1
2521 31.30776 -5.26562 -28.71212 9
2522 42.83883 16.17149 -30.01165 9
2523 43.44104 9.82977 -32.33927 9
2524 42.00518 9.84447 -27.20803 9
2525 41.54536 16.64086 -28.2348 9
2526 38.7667 17.46279 -34.6221 9
2527 33.54368 15.91153 -36.12695 9
2528 36.73229 13.3138 -37.64901 9
2529 37.33171 3.21535 -17.42924 11
2530 40.42764 3.23059 -24.71432 11
2531 33.87345 10.52565 -12.44032 11
2532 34.46164 5.73117 -16.36845 11
2533 34.45827 2.9676 -21.58824 9
2534 34.52245 11.27706 -33.62302 9
2535 28.54492 12.05082 -36.05314 9
2536 38.82254 8.30154 -29.58712 9
2537 35.76922 4.97236 -29.97894 9
2538 32.92189 2.1833 -26.21395 9
2539 27.68223 5.98024 -34.69627 9
2540 28.19098 7.42238 -39.10679 9
2541 29.84073 1.37093 -28.10019 9
2542 27.01037 -0.56406 -28.92234 9
2543 25.38506 -2.83437 -31.03086 9
2544 45.20972 8.70228 -37.03212 9
2545 35.23045 6.11822 -36.50449 9
2546 40.36069 7.94613 -37.31855 9
2547 42.70374 3.72636 -35.71044 9
2548 42.76046 -2.21248 -38.28102 9
2549 30.05406 3.66517 -39.16308 9
2550 31.6372 5.03721 -40.80696 9
2551 26.57035 -1.49407 -35.00045 9
2552 31.49701 -1.63986 -36.21451 9
2553 33.23183 -5.13046 -38.58187 9
2554 40.37075 -2.07944 -43.28603 9
2555 44.87521 -5.18951 -42.63576 9
2556 35.14919 1.37311 -42.47278 9
2557 35.91143 -2.61362 -42.63024 9
2558 36.89863 -4.20289 -37.12302 9
2559 44.45048 -8.94243 -39.5535 9
2560 40.94599 -6.53095 -34.7337 9
2561 44.15121 -11.25588 -32.77923 9
